# Supplementary material
Source: PubMed Central journal article supplement (PMC6050711)
Supplement: mmc1.pdf [file mmc1.pdf]

**Biophysical Journal, Volume 114**

**Supplemental Information**

**A Multicolor Split-Fluorescent Protein Approach to Visualize *Listeria*  
Protein Secretion in Infection**

**Dilara Batan, Esther Braselmann, Michael Minson, Dieu My Thanh Nguyen, Pascale Cossart, and Amy E. Palmer**

## A multicolor split-fluorescent protein approach to visualize *Listeria* protein secretion in infection

### Supplementary Information

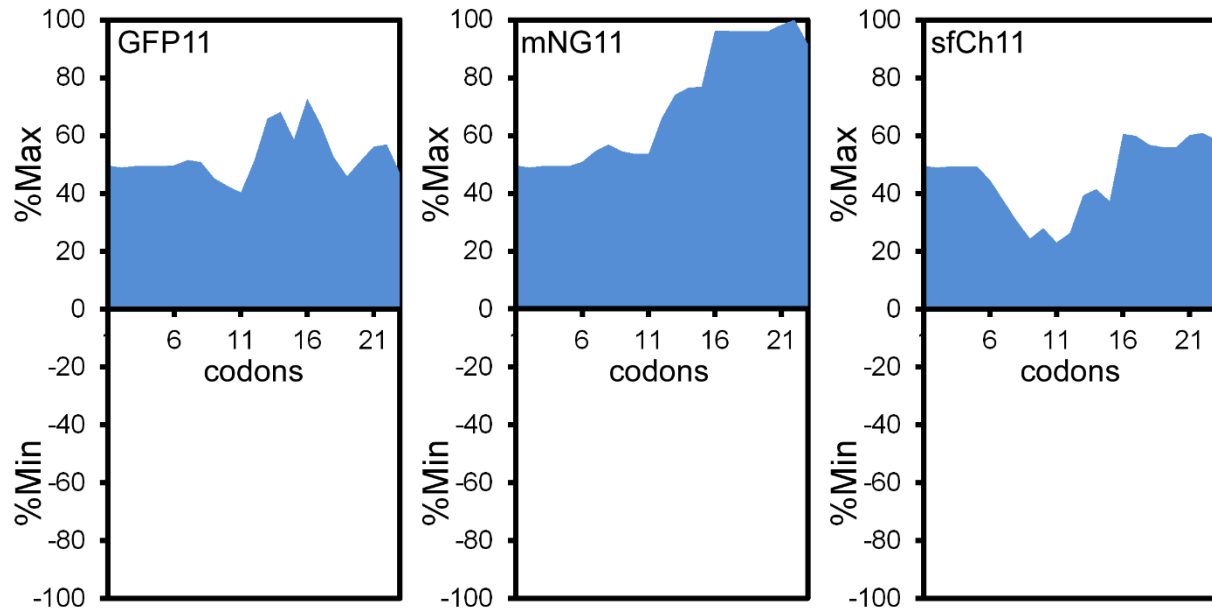

**Figure S1:** Codon usage for *Listeria monocytogenes* in split fluorescent protein tags. Codon usage in designed tags (see Table S3) were analyzed with the %MinMax algorithm (54), where codon usage is analyzed for a sliding window across the sequence. Positive values (%Max) indicate usage of common codons, whereas negative values (%Min) indicate rare codons.

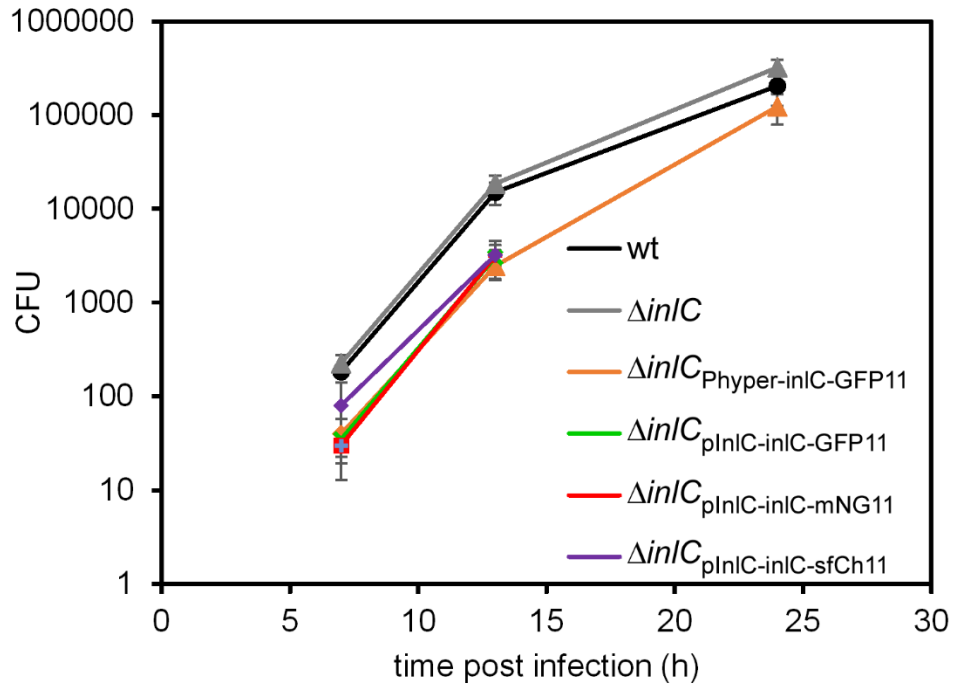

**Figure S2:** CFU analysis of HeLa cells infected for different lengths with the indicated strains (average from n=3 independent experiments, error bars indicate STD). 7 h time point:  $p = 0.015$ ; 13 h time point:  $p = 0.0035$ , 24 h time point:  $p = 0.0045$  (ANOVA test).

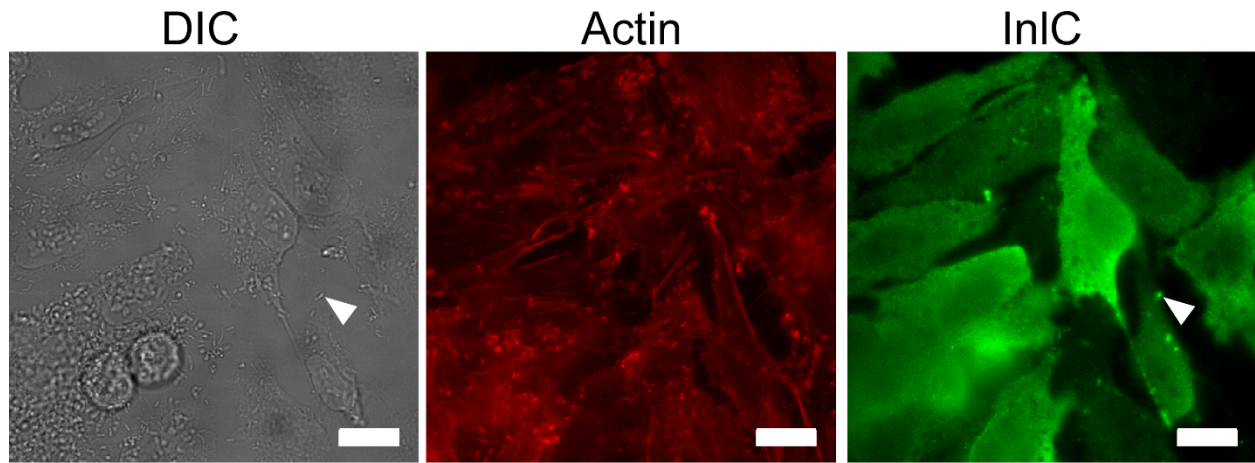

**Figure S3:** InIC occasionally localizes to puncta consistent with cell protrusions from *Listeria* spreading from cell to cell (white arrow). Shown is a select region of interest for infection of HeLa cells with  $\Delta inIC_{\text{Phyper-inIC-GFP11}}$  (see Fig. 3 for details). Scale bar = 20  $\mu\text{m}$ .

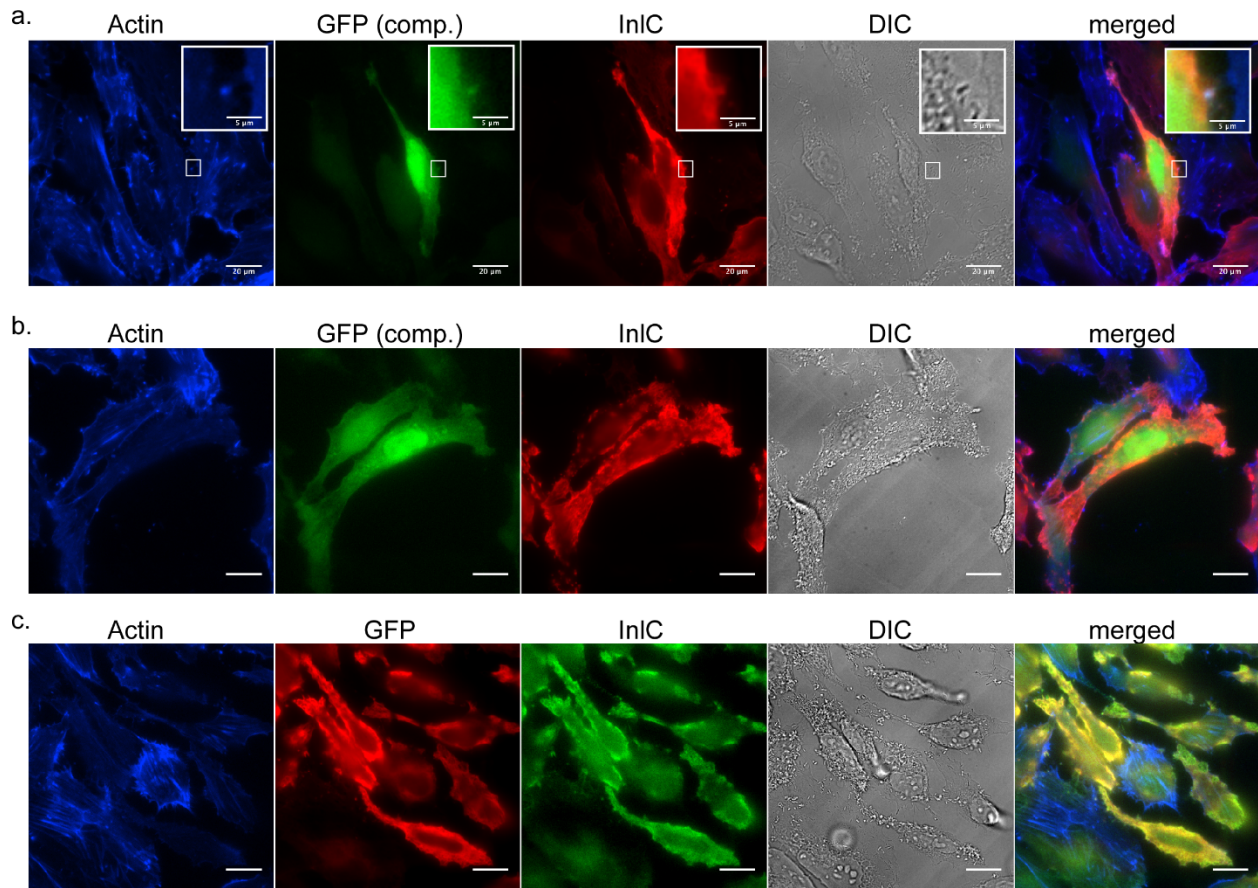

**Figure S4:** GFP signal after complementation colocalizes with fluorescence signal from anti-InIC immunofluorescence. (a, b) HeLa cells producing GFP1-10 were infected with  $\Delta inIC_{pInIC-inIC-GFP11}$  overnight and cells were fixed. After permeabilization, actin was stained with Coumarin-phalloidin and InIC was detected by immunofluorescence. The overall pattern and the insert in (a) demonstrate colocalization of complemented GFP signal and InIC. Note that the InIC signal in the nucleus appears brighter when detected by complemented GFP vs. anti-InIC immunofluorescence. This could be due to incomplete permeabilization of the nuclear envelope. Panels (a) and (b) show representative fields of view. (c) HeLa cells were infected with  $\Delta inIC_{pInIC-inIC-GFP11}$  overnight and cells were fixed. After permeabilization, actin was stained with Coumarin-phalloidin and InIC as well as GFP was detected by immunofluorescence. Scale bar = 20  $\mu\text{m}$  (scale bar for insert in panel (a) = 5  $\mu\text{m}$ ).

## Supplementary Tables

| Strain Name                       | Resistance   | Detailed genotype and source                                     |
|-----------------------------------|--------------|------------------------------------------------------------------|
| wt                                | none         | EGD-e wt (BUG 1600) (51)                                         |
| $\Delta inlC$                     | none         | EGD-e $\Delta inlC$ (Cossart lab collection, BUG 2118)           |
| $\Delta inlC_{Phyper-inlC-GFP11}$ | erythromycin | EGD-e $\Delta inlC$ pAT18_ <i>Phyper_inlC_GFP11</i> (this study) |
| $\Delta inlC_{pInlC-inlC-GFP11}$  | erythromycin | EGD-e $\Delta inlC$ pAT18_ <i>pInlC_inlC_GFP11</i> (this study)  |
| $\Delta inlC_{pInlC-inlC-mNG11}$  | erythromycin | EGD-e $\Delta inlC$ pAT18_ <i>pInlC_inlC_mNG11</i> (this study)  |
| $\Delta inlC_{pInlC-inlC-sfCh11}$ | erythromycin | EGD-e $\Delta inlC$ pAT18_ <i>pInlC_inlC_sfCh11</i> (this study) |

**Table S1:** Names, genotypes and source of all strains used in this study along with antibiotic selection markers.

*Phyper*

5' **TCTAGA**AGACGAAAGGGCC**TAATTTTGCAAAAAGTTGTTGACTTTATCTACAAGGTGTGGC**  
**ATAATGTGTGTCTGGCC**ATAAAGCAAGCATATAATATTGCGTTTCATCTTTAGAAGCGAATTC  
**GCCAATATTATAATTATCAAAAGAGAGGGGTGGCAAACGGTATTTGGCATTATTAGGTAAAA**  
**AATGTAGAAGGAGAGTGAAACCC** **ATG TTG...**

*pinlC*

5' **TCTAGA**AGACGAAAGGGCCATTATTAACGCTTGTTAATTTAAACATCTCTTATTTTTGCTA  
**ACATATAAGTATACAAAGGGACATAAAAAGGTAAACAGCGTTTGTTAAATAGGAAGTATATGA**  
**AAATCCTCTTTTGTGTTTCTAAATTTATTTTTAAGGAGTGGAGA**CGGTCCGCTAGC **ATG**  
**TTG...**

**Table S2:** Sequences of *Phyper* and *pinlC*. The 5' *Xba*I restriction site flanking the *inlC* fusion genes is indicated in bold and underlined and the beginning of the *inlC* coding sequence (ATG TTG...) at the 3' end of the promoters is shown in bold. Top: the blue underlined region is the *Phyper* region and the *hly* 5'UTR is shown in yellow and underlined. Bottom: the green underlined region corresponds to the *inlC* promoter.

|                                                                                                                      |                                               |
|----------------------------------------------------------------------------------------------------------------------|-----------------------------------------------|
| GFP11 tag                                                                                                            |                                               |
| K N A S G S S G E Q K L I S E<br>5' <b>AAG AAT</b> <u>GCT AGC</u> gga agt agt ggt <u>GAA CAA AAA CTC ATC TCA GAA</u> | <i>inlC</i> <i>NheI</i> linker <i>myc tag</i> |
| E D L G S S G R D H M V L H E Y<br>GAG GAT TTA ggt agt agc gga <u>CGT GAT CAT ATG GTA TTA CAT GAA TAT</u>            | linker <i>GFP11</i>                           |
| V N A A G I T STOP<br>GTG AAC GCG GCG GGC ATT ACA TAA <u>GTC GAC...</u>                                              | <i>Sall</i>                                   |
| mNG11 tag                                                                                                            |                                               |
| K N A S G S S G E Q K L I S E<br>5' <b>AAG AAT</b> <u>GCT AGC</u> gga agt agt ggt <u>GAA CAA AAA CTC ATC TCA GAA</u> | <i>inlC</i> <i>NheI</i> linker <i>myc tag</i> |
| E D L G S S G T E L N F K E W Q<br>GAG GAT TTA ggt agt agc gga <u>ACA GAA TTA AAT TTT AAA GAA TGG CAA</u>            | linker <i>mNG11</i>                           |
| K A F T D M M STOP<br>AAA GCA TTT ACA GAT ATG ATG TAA <u>GTC GAC...</u>                                              | <i>Sall</i>                                   |
| sfCh11 tag                                                                                                           |                                               |
| K N A S G S S G E Q K L I S E<br>5' <b>AAG AAT</b> <u>GCT AGC</u> gga agt agt ggt <u>GAA CAA AAA CTC ATC TCA GAA</u> | <i>inlC</i> <i>NheI</i> linker <i>myc tag</i> |
| E D L G S S G Y T I V E Q Y E R<br>GAG GAT TTA ggt agt agc gga <u>TAC ACC ATC GTA GAA CAA TAC GAA CGT</u>            | linker <i>sfCh11</i>                          |
| A E A R H S T STOP<br>GCA GAA GCA CGT CAT AGT ACA TAA <u>GTC GAC...</u>                                              | <i>Sall</i>                                   |

**Table S3:** DNA and protein sequences of split-FP tags at the 3' end of *InlC* used in this study.

The 3' end of the *inlC* gene and relevant sequence features are annotated.



|                                                                                                                                                                                                                                                                                                    |
|----------------------------------------------------------------------------------------------------------------------------------------------------------------------------------------------------------------------------------------------------------------------------------------------------|
| <p><b>GFP1-10 (34)</b></p> <p>MVSKGEELFT GVPILVELD GDVNGHKFSV RGEGEGDATI GKLTCLKFICT<br/> TGKLPVPWPT LVTTLTYGVQ CFSRYPDHMK RHDFFKSAMP EGYVQERTIS<br/> FKDDGKYKTR AVVKFEGDTL VNRIELKGTD FKEDGNILGH KLEYNFNSHN<br/> VYITADKQKN GIKANFTVRH NVEDGSVQLA DHYQQNTPIG DGPVLLPDNH<br/> YLSTQTVLSK DPNEK</p> |
| <p><b>mNG1-10 (52)</b></p> <p>MVSKGEEDNM ASLPATHELH IFGSINGVDF DMVGQGTGNP NDGYEELNLK<br/> STKGDLDQFSP WILVPHIGYG FHQYLPYPDG MSPFQAAMVD GSGYQVHRMT<br/> QFEDGASLTV NYRYTYEGSH IKGEAQVMGT GFPADGPVMT NTLTAADWCM<br/> SKKTYPNDKT IISTFKWSYT TVNGKRYRST ARTTYTFAKP MAANYLKNQP<br/> MYVFRKTELK HSM</p>  |
| <p><b>sfCh1-10 (52)</b></p> <p>MEEDNMAIIK EFMRFKVHME GSVNGHEFEI EGEGEGHPYE GTQTAKLKVT<br/> KGGPLPFAWD ILS PQFMYGS KAYVKHPADI PDYLLKLSFPE GFTWERVMNF<br/> EDGGVVTVTQ DSSLQDGQFI YKVKLLGINF PSDGPVMQKK TMGWEASTER<br/> MYPEDGALKG EINQRLKLD GGHYDAEVKT TYKAKKPVQL PGAYNVDIKL<br/> DITSHNED</p>       |

**Table S4:** Protein sequences for fluorescent protein 1-10 (FP1-10) constructs used in this study.

Each FP1-10 corresponds to the first 10  $\beta$ -strands of the FP; the last and 11<sup>th</sup> strand represents the other fragment of the split-FP system (Table S3).

| <b>Antibody / stain (source)</b>                                                | <b>Dilution / incubation time</b>                                                                                  | <b>Purpose</b>                          |
|---------------------------------------------------------------------------------|--------------------------------------------------------------------------------------------------------------------|-----------------------------------------|
| Alexa 594-Phalloidin (Fisher Scientific, Waltham, MA)                           | 1:1,000 / 45 min                                                                                                   | Actin staining in fixed cells           |
| Coumarin-phalloidin (Sigma-Aldrich, St. Louis, MO)                              | 1:1,000 / 45 min                                                                                                   | Actin staining in fixed cells           |
| Anti-GFP (mouse) (Thermo Fisher Scientific, Waltham, MA)                        | 1:1,000 / 45 min                                                                                                   | Immunofluorescence                      |
| Anti-InlC (rabbit) (Cossart lab (46))                                           | <u>Immunofluorescence:</u> 1:500 / 45 min at room temperature<br><u>Western blotting:</u> 1:500 / overnight at 4°C | Immunofluorescence and Western blotting |
| Goat anti-rabbit HRP conjugated (Novus Biologicals, Littleton, CO)              | 1:2,000 / 1 h at room temperature                                                                                  | Western blotting                        |
| Rabbit anti-mouse IgG (Alexa Fluor 488) (Thermo Fisher Scientific, Waltham, MA) | 1:1,000 / 45 min at room temperature                                                                               | Immunofluorescence                      |
| Donkey anti-rabbit IgG H&L (Alexa Fluor 568) (Abcam, Cambridge, MA)             | 1:1,000 / 45 min at room temperature                                                                               | Immunofluorescence                      |

|                                                                           |                                         |                    |
|---------------------------------------------------------------------------|-----------------------------------------|--------------------|
| Donkey anti-rabbit IgG H&L<br>(Alexa Fluor 488) (Abcam,<br>Cambridge, MA) | 1:1,000 / 45 min at room<br>temperature | Immunofluorescence |
|---------------------------------------------------------------------------|-----------------------------------------|--------------------|

**Table S5:** List of antibodies and stains used in this study.

|                                                                        |                                                                                                                                       |                                                                                                                                          |                                                                                                                                    |
|------------------------------------------------------------------------|---------------------------------------------------------------------------------------------------------------------------------------|------------------------------------------------------------------------------------------------------------------------------------------|------------------------------------------------------------------------------------------------------------------------------------|
| Immunofluorescence of infections (Fig. 3, S2)                          | <u>GFP:</u><br>287 ms exposure, EM gain 1 MHz at 16-bit readout mode, EM gain multiplier = 200, neutral density filter (25% emission) | <u>mCherry:</u><br>90 ms exposure, EM gain 1 MHz at 16-bit readout mode, EM gain multiplier = 200, neutral density filter (25% emission) | <u>DIC:</u><br>50 ms exposure, EM gain 1 MHz at 16-bit readout mode, EM gain multiplier = 0, neutral density filter (25% emission) |
| Proof of principle live imaging of split-GFP complementation (Fig. 4a) | <u>GFP:</u><br>50 ms exposure, EM gain 1 MHz at 16-bit readout mode, EM gain multiplier = 200, neutral density filter (25% emission)  | <u>Dapi:</u><br>287 ms exposure, EM gain 1 MHz at 16-bit readout mode, EM gain multiplier = 200, neutral density filter (25% emission)   | <u>DIC:</u><br>50 ms exposure, EM gain 1 MHz at 16-bit readout mode, EM gain multiplier = 0, neutral density filter (25% emission) |
| GFP complementation time course (Fig. 4b)                              | <u>GFP:</u><br>50 ms exposure, EM gain 1 MHz at 16-bit readout mode, EM gain multiplier = 200, neutral density filter (25% emission)  | <u>Dapi:</u><br>287 ms exposure, EM gain 1 MHz at 16-bit readout mode, EM gain multiplier = 200, neutral density filter (25% emission)   | <u>DIC:</u><br>50 ms exposure, EM gain 1 MHz at 16-bit readout mode, EM gain multiplier = 0, neutral density filter (25% emission) |
| GFP complementation                                                    | <u>GFP:</u>                                                                                                                           | <u>Dapi:</u>                                                                                                                             | <u>DIC:</u>                                                                                                                        |

|                                              |                                                                                                              |                                                                                                           |                                                                                                       |
|----------------------------------------------|--------------------------------------------------------------------------------------------------------------|-----------------------------------------------------------------------------------------------------------|-------------------------------------------------------------------------------------------------------|
| promoter comparison end point (Fig. 8)       | 287 ms exposure, EM<br>gain 1 MHz at 16-bit<br>readout mode, EM<br>gain multiplier = 200                     | 287 ms exposure, EM<br>gain 1 MHz at 16-bit<br>readout mode, EM<br>gain multiplier = 200                  | 70 ms exposure, EM<br>gain 1 MHz at 16-bit<br>readout mode, EM<br>gain multiplier = 0                 |
| Super-folder Cherry complementation (Fig. 8) | <u>mCherry</u> :<br>287 ms exposure, EM<br>gain 1 MHz at 16-bit<br>readout mode, EM<br>gain multiplier = 200 | <u>DIC</u> :<br>50 ms exposure, EM<br>gain 1 MHz at 16-bit<br>readout mode, EM<br>gain multiplier = 200   |                                                                                                       |
| mNeonGreen complementation (Fig. S3)         | <u>GFP</u> :<br>287 ms exposure, EM<br>gain 1 MHz at 16-bit<br>readout mode, EM<br>gain multiplier = 200     | <u>DIC</u> :<br>50 ms exposure, EM<br>gain 1 MHz at 16-bit<br>readout mode, EM<br>gain multiplier = 0     |                                                                                                       |
| GFP complementation in macrophages (Fig. 7)  | <u>GFP</u> :<br>287 ms exposure, EM<br>gain 1 MHz at 16-bit<br>readout mode, EM<br>gain multiplier = 200     | <u>Dapi</u> :<br>287 ms exposure, EM<br>gain 1 MHz at 16-bit<br>readout mode, EM<br>gain multiplier = 200 | <u>DIC</u> :<br>90 ms exposure, EM<br>gain 1 MHz at 16-bit<br>readout mode, EM<br>gain multiplier = 0 |

**Table S6:** Settings for fluorescence microscopy on Nikon Ti-E widefield fluorescence microscope.
