# Supplementary material
Source: PubMed Central journal article supplement (PMC6050711)
Supplement: mmc2.pdf [file mmc2.pdf]

# A Multicolor Split-Fluorescent Protein Approach to Visualize *Listeria* Protein Secretion in Infection

Dilara Batan,<sup>1</sup> Esther Braselmann,<sup>1,2</sup> Michael Minson,<sup>1,2</sup> Dieu My Thanh Nguyen,<sup>2</sup> Pascale Cossart,<sup>3,4,5</sup> and Amy E. Palmer<sup>1,2,\*</sup>

<sup>1</sup>Department of Chemistry and Biochemistry and <sup>2</sup>BioFrontiers Institute, University of Colorado, Boulder, Colorado; <sup>3</sup>Unité des Interactions Bactéries-Cellules, Département de Biologie Cellulaire et Infection, Institut Pasteur, Paris, France; <sup>4</sup>Inserm U604, Paris, France; and <sup>5</sup>French National Institute for Agricultural Research, Unité Sous-Contrat 2020, Paris, France

**ABSTRACT** *Listeria monocytogenes* is an intracellular food-borne pathogen that has evolved to enter mammalian host cells, survive within them, spread from cell to cell, and disseminate throughout the body. A series of secreted virulence proteins from *Listeria* are responsible for manipulation of host-cell defense mechanisms and adaptation to the intracellular lifestyle. Identifying when and where these virulence proteins are located in live cells over the course of *Listeria* infection can provide valuable information on the roles these proteins play in defining the host-pathogen interface. These dynamics and protein levels may vary from cell to cell, as bacterial infection is a heterogeneous process both temporally and spatially. No assay to visualize virulence proteins over time in infection with *Listeria* or other Gram-positive bacteria has been developed. Therefore, we adapted a live, long-term tagging system to visualize a model *Listeria* protein by fluorescence microscopy on a single-cell level in infection. This system leverages split-fluorescent proteins, in which the last strand of a fluorescent protein (a 16-amino-acid peptide) is genetically fused to the virulence protein of interest. The remainder of the fluorescent protein is produced in the mammalian host cell. Both individual components are nonfluorescent and will bind together and reconstitute fluorescence upon virulence-protein secretion into the host cell. We demonstrate accumulation and distribution within the host cell of the model virulence protein InlC in infection over time. A modular expression platform for InlC visualization was developed. We visualized InlC by tagging it with red and green split-fluorescent proteins and compared usage of a strong constitutive promoter versus the endogenous promoter for InlC production. This split-fluorescent protein approach is versatile and may be used to investigate other *Listeria* virulence proteins for unique mechanistic insights in infection progression.

## INTRODUCTION

The facultative intracellular pathogen *Listeria monocytogenes* is the causative agent of the food-borne disease listeriosis and has emerged as a model system to study host-pathogen interactions on a cellular (1–5) and organismal level (6,7). This Gram-positive bacterium can cross the placental, intestinal and blood-brain barrier, making *Listeria* infections particularly dangerous for immunocompromised patients and pregnant women, for whom it can lead to miscarriage (8). *Listeria* can enter different types of mammalian cells—including epithelial cells and macrophages—escape the internalization vacuole, replicate within the cytosol while escaping the immune response, and spread from cell to cell (1,8). *Listeria* infection progression often displays heterogeneous

phenotypes on a single-cell level, including intracellular replication patterns that vary from cell to cell both in space and time (9,10) and nonsynchronized spread from cell to cell (11). Approaches to investigate single-cell infection dynamics, including fluorescence microscopy assays (12), can provide insights in *Listeria* infections that cannot be gathered by bulk assays.

To enable and support the intracellular lifecycle, *Listeria* produces and secretes a series of proteins called virulence proteins during the infection process (13,14). Over 700 proteins were predicted to have a signal peptide for secretion via Sec (15), the major secretion pathway in *Listeria* (16). Six other secretion pathways exist in *Listeria* (13,17), and protein clients of these pathways continue to be cataloged by proteomic analyses (18,19). The timing of protein secretion and localization within the host cell often correlates with function. For example, OrfX (20) and LntA (21) localize to the host nucleus, where they interact with host proteins and modulate their function. In the nuclei of

Submitted December 7, 2017, and accepted for publication March 20, 2018.

\*Correspondence: amy.palmer@colorado.edu

Dilara Batan and Esther Braselmann contributed equally to this work.

Editor: David Piston.

<https://doi.org/10.1016/j.bpj.2018.03.016>

© 2018 Biophysical Society.

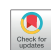

macrophages, OrfX directly interacts with and reduces levels of RybP, a regulator of innate immunity, among other functions (20). LntA interacts with BAHD1, a factor involved in chromatin remodeling, which results in immune response modulation (21). The well-characterized virulence protein ActA is secreted to the *Listeria* surface and promotes actin nucleation to enable *Listeria*'s spread from cell to cell (11,22–24). More recently, it was found that ActA has an additional function in biofilm formation (25,26). Similarly, new roles of perhaps the most heavily studied *Listeria* virulence protein, listeriolysin O (27–29), continue to be discovered (30), including roles in organelle and histone manipulation (31,32). Together, a picture of complex dynamics with ever-increasing diversity of localization patterns and functionalities for secreted virulence proteins emerges, necessitating approaches to track these proteins on a single-cell level during infection for mechanistic insights.

Live-fluorescence-microscopy approaches are ideal to dissect dynamics of bacterial infections on a single-cell level. We and others previously developed live fluorescence tools to visualize and quantify effector proteins secreted from different Gram-negative pathogens in infection, including *Salmonella*, *Shigella*, and *Escherichia coli* (33–40). The effector proteins labeled by different fluorescent tags in these studies are secreted by the type III secretion system (41), a well-studied and common protein secretion pathway across the inner and outer membrane in Gram-negative bacteria. A particularly powerful tool is the split-green fluorescent protein (GFP) system, in which the last  $\beta$ -strand of GFP (GFP11, 16 amino acids) is genetically fused to the protein of interest via a short and flexible linker (34,35) (see also Fig. 1 a). The remainder of GFP (called GFP1-10) is produced in the host cell, and the individual components are nonfluorescent. Upon secretion of the

GFP11-tagged effector protein, the two components complement and produce fluorescent GFP, allowing visualization and tracking of the effector via GFP. Importantly, by using only GFP11 and not the stable full-length GFP, steric interference with the protein-secretion apparatus is minimized (34,35). Using this approach, effector dynamics in single infected cells were readily resolved, including visualization of effector dynamics, localization within host cells, and quantification of effector protein levels over the course of infection (33–35). Live-fluorescence-tagging approaches of secreted proteins from *Listeria* or other Gram-positive pathogens have not been demonstrated. We sought to test if the split-fluorescent protein system could be adapted to visualize secreted *Listeria* proteins of interest in the context of infection.

Internalin C (InIC) is a *Listeria* protein from the internalin family (42) that is secreted via the Sec pathway (15) and controlled by the PrfA transcriptional regulator (43). In whole-animal mice studies, virulence of an *inlC* deletion strain was significantly attenuated (42), but bacterial uptake and intracellular replication were not affected by deletion of InIC (44). InIC's role in infection is underscored by the fact that *inlC* is absent in nonpathogenic *Listeria* strains and expression is high in infection conditions, namely in the intestine and blood (45). Two functions of InIC have been described in the literature. Gouin et al. demonstrated that InIC interferes with the host innate immune response by directly interacting with IKK $\alpha$  (46), whereas Rajabian et al. found that InIC promotes cell-to-cell spread by relieving membrane tension via interaction with the adaptor protein Tuba (44). We chose InIC as an ideal test case to establish split-fluorescent protein tagging for the following reasons. First, InIC was produced with C-terminal fusions in various contexts, including tagging with a *myc* tag (46) and usage of an affinity tag for protein purification (47),

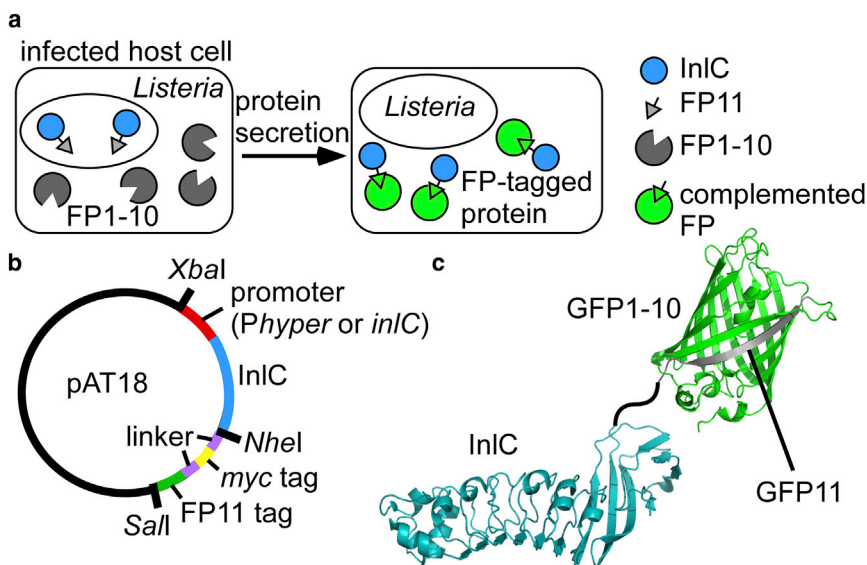

FIGURE 1 Overview of strategy for tagging *Listeria* virulence proteins with split-fluorescent proteins (FPs). (a) An illustration of split-FP application in *Listeria* infection is shown. *Listeria* cells produce InIC with a C-terminal FP11 tag (the 11th strand of a fluorescent protein of interest, see Table S3 for sequence information of the tag). The host cell produces the remaining portion of the FP (FP1-10, see Table S4 for sequence information). After secretion of InIC-FP11, the two components of the FP complement, producing a fluorescent protein tag. (b) A plasmid overview for production of InIC-FP11 variants in *Listeria* is shown. In this study, two different promoters (*Phyper* and the endogenous *inlC* promoter) and three different FP11 tags were used (GFP11, mNeonGreen11, and super-folder Cherry11). The FP11 tag is fused to InIC via a flexible linker that includes a *myc* tag (see Table S3). (c) Structures of InIC (47) and GFP (61) illustrating C-terminal tagging of InIC via a flexible linker are shown. To see this figure in color, go online.

indicating that a C-terminal tag is unlikely to interfere with protein production or function. Furthermore, the crystal structure of InIC is known (47), and manual inspection suggests that the InIC C-terminus is accessible and that a tag is unlikely to interfere with function (Fig. 1 c). GFP complementation in infection takes  $\sim 2$  h (34,35) and is therefore ideal for robust visualization of virulence proteins at later infection time points. Indeed, several studies indicate high levels of InIC accumulation in infected epithelial cells at late infection stages ( $>4$  h) both by Western blotting analysis (46) and immunofluorescence (46,48–50). Lastly, the available immunofluorescence data in the literature (46,48–50) allow for assessment of InIC localization patterns by our split-fluorescent protein system. Together, visualizing secretion dynamics of tagged InIC in infection serves as a robust platform to establish the split-fluorescent protein tool in *Listeria*.

## MATERIALS AND METHODS

### Strains and plasmids

An overview of *Listeria* strains used in this study is presented in Table S1 (see also Fig. 1 b for a schematic). All experiments were done in *Listeria monocytogenes* EGDe (BUG 1600) (51) or a variant of this strain in which *inlC* was deleted (EGDe  $\Delta inlC$ , BUG 2118). Plasmids for production of InIC-fusions in *Listeria* were generated in *E. coli* Stellar cells (Takara Bio USA, Mountain View, CA) as follows. A unique *Xba*I site was introduced upstream of the *Phy*per promoter in pAT18\_cGFP (12) by standard site-directed mutagenesis techniques. A unique *Sal*I site is located immediately after the cGFP stop codon. The region encompassing the *Phy*per promoter and the cGFP coding sequence was removed via *Xba*I and *Sal*I restriction digestion and replaced by inserts encoding for various *inlC* fusions (see Fig. 1 b). Variants of the inserts include two different promoters (*Phy*per versus the *inlC* promoter) and the 11th strand of different fluorescent proteins, namely the 11th strand of GFP (GFP11) (34,35), the 11th strand of mNeonGreen (mNG11) (52), and the 11th strand of super-folder Cherry (sfCh11) (52). These inserts were purchased as g-block (IDT, San Jose, CA) DNA fragments, including *Xba*I and *Sal*I restriction sites for ligation. Annotated sequences for promoters and the tag sequences are provided in Tables S2 and S3. The DNA and resulting protein coding sequences for the GFP11, mNG11, and sfCh11 tags are shown in Table S3. The promoter and coding sequence for *inlC* were retrieved from the National Library of Medicine, US, National Center for Biotechnology Information, available from <https://www.ncbi.nlm.nih.gov/gene/> (gene ID: 985945, *inlC* internalin C (*Listeria monocytogenes* EGD-e)). To ensure optimal expression in *Listeria*, the codon usage for the tags was optimized manually according to codon usage in *Listeria* (53) and verified using the %MinMax codon usage quantification algorithm (54) (Fig. S1).

For fluorescent protein complementation, a plasmid encoding GFP1-10 and a nuclear blue fluorescent protein (BFP) marker was used (described earlier (34)). Plasmids to produce strands 1–10 of mNeonGreen (mNG1-10) and super-folder Cherry (sfCh1-10) were a gift from Bo Huang (52). The coding sequences of each gene were ligated into pCDNA3.1(+) using standard cloning methods. Protein sequences of GFP1-10, mNG1-10, and sfCh1-10 are listed in Table S4.

### Culture of bacteria

*Listeria* strains were grown in brain heart infusion (BHI) media (Thermo Fisher Scientific, Waltham, MA) at 37°C. *E. coli* strains were grown in

Luria-Bertani broth (Thermo Fisher Scientific) at 37°C. When required, erythromycin was added at a final concentration of 5  $\mu$ g/mL for *Listeria* and at a final concentration of 150  $\mu$ g/mL for *E. coli* (see Table S1). Growth curves of *Listeria* strains were collected as follows. A saturated overnight culture of each strain was diluted to an optical density (O.D.) at 600 nm of 0.001. Wells of a 96-well plate with clear bottom were filled with 300  $\mu$ L of each culture in triplicate. Growth of bacterial cultures was monitored via O.D. at 600 nm every 30 min at 30°C for 18 h in a Tecan Safire-II plate reader (Tecan, Männedorf, Switzerland) while leaving the plate shaking.

### *Listeria* electroporation

To introduce plasmids into *Listeria* strains, cells were grown for 2 h at 37°C and shaken at 180 rotations per minute until an O.D. of 0.2 at 600 nm was reached. Penicillin-G was added to a final concentration of 0.12  $\mu$ g/mL. The *Listeria* cells were grown for an additional 3 h until the final O.D. was between 0.6 and 0.8 at 600 nm. Cells were harvested by centrifugation for 30 min at 4000 rotations per minute and resuspended in cold (4°C) electroporation buffer consisting of 816 mM sucrose, 1 mM MgCl<sub>2</sub> (pH 7). Cells were washed three times using 100, 66, and 33 mL electroporation buffer in subsequent steps. All resuspension steps were performed at 4°C. The washed cells were resuspended at a concentration of  $\sim 1 \times 10^{11}$  cells/mL in electroporation buffer. Aliquots of 100  $\mu$ L cells were placed in electroporation cuvettes with a 0.2 cm gap (Bio-Rad, Hercules, CA) along with 5  $\mu$ L plasmid DNA at a concentration of 1  $\mu$ g/ $\mu$ L. Cells were electroporated at 2.4 kV, 200 Ohms, and 25  $\mu$ F. The cells were immediately transferred in 900  $\mu$ L prewarmed BHI media and incubated at 37°C for 3 h, followed by plating on selective plates and incubation at 37°C overnight.

### Mammalian cell culture

HeLa cells (ATCC CCL-2) were used as model epithelial cells in this study. Cells were maintained in Dulbecco's modified Eagle's medium (DMEM) (Thermo Fisher Scientific) supplemented with 10% (vol/vol) fetal calf serum (FBS) (Thermo Fisher Scientific). Cells were grown at 37°C with 5% CO<sub>2</sub>. HeLa cells were passaged every 2–4 days and not used past passage 12. To passage cells, they were first rinsed with phosphate-buffered saline (PBS) incubated with trypsin EDTA (Thermo Fisher Scientific) until cells had detached. Trypsin was quenched with DMEM/FBS media, and cells were seeded in new dishes. For high throughput comparison of GFP complementation (Fig. 6), a stable HeLa cell line expressing GFP1-10 and the nuclear marker TagBFP was used as previously described (34).

Primary bone-marrow-derived macrophages (BMDMs) were isolated as previously described (55). Briefly, marrow was flushed with PBS from the femurs and tibias of 2–3-month-old SV129S6 mice (Taconic Biosciences, Hudson, NY). The cells were overlaid onto an equal volume of Histopaque-1083 (Sigma-Aldrich, St. Louis, MO) and centrifuged at 500  $\times g$  for 25 min. Monocytes at the interface were harvested and incubated for 6–7 days at 37°C in 5% CO<sub>2</sub> in DMEM (Sigma-Aldrich) supplemented with FBS (20%), L-glutamine (2 mM), sodium pyruvate (1 mM), beta-mercaptoethanol (50  $\mu$ M), HEPES (10 mM), and penicillin-streptomycin (50 IU/mL of penicillin and 50  $\mu$ g/mL of streptomycin) containing recombinant murine macrophage-colony-stimulating factor (10 pg/ $\mu$ L) (PeproTech, Rocky Hill, NJ) to promote monocyte differentiation into macrophages.

### Bacterial infections

To visualize fluorescent protein complementation in live infections, 0.15  $\times 10^6$  HeLa cells were seeded 2 days before the infection in homemade imaging dishes (35 mm) with a 10 mm center hole covered by cover glass (No. 1.5; VWR International, Aurora, CA). DNA encoding for GFP1-10 (or mNG1-10 or sfCh1-10) was transfected on day two, using the *TransIT* transfection system at a concentration of 2.5  $\mu$ g per imaging dish according to the manufacturer's recommendations (Mirus Bio, Madison, WI). One

dish was treated equally and used on the day of the infection for counting to determine the multiplicity of infection (MOI). On the day of the infection, a saturated overnight culture of the *Listeria* strain of interest was diluted 10-fold in BHI media (supplemented with antibiotic as necessary) and grown for about 3 h while periodically measuring the O.D. at 600 nm. When the O.D. at 600 nm reached 0.6–0.8, bacteria were pelleted and rinsed in DMEM media three times. To calculate the MOI, we assumed each O.D. unit at 600 nm corresponded to  $10^9$  bacteria/mL. Infections were performed at an MOI of 100. HeLa cells to be infected were rinsed with DMEM media three times. The media was then replaced with DMEM supplemented with *Listeria* cells. The infected cells were incubated in 37°C and 5% CO<sub>2</sub> for 1 h. The media was then exchanged with DMEM media with 10% FBS supplemented with 20 µg/mL of gentamicin (Thermo Fisher Scientific). The cells were then incubated for the remainder of the infection course in 37°C/5% CO<sub>2</sub>.

For infections without live cell complementation,  $0.25 \times 10^6$  HeLa cells were seeded, and the infection was performed as described above on the following day.

To monitor infection in macrophages, differentiated primary macrophages at 6 days postisolation were lifted by scraping, and cells were subjected to nucleofection using 2.5 µg of DNA and reaction conditions recommended by the manufacturer for Nucleofector Program Y-001 (Lonza, Allendale, NJ). Nucleofected cells were seeded into 35 mm glass-bottom dishes and incubated at 37°C with 5% CO<sub>2</sub> for 6–24 h before infection and imaging. Macrophage cells producing GFP1-10 were infected with the  $\Delta inlC_{plInlC-inlC-GFP11}$  strain at an MOI of 5. Infections were allowed to proceed for 45 min at 37°C and 5% CO<sub>2</sub> before the media was changed to phenol-red-free DMEM and 20 µg/mL gentamicin. The cells were incubated in 37°C/5% CO<sub>2</sub> during the course of the infection and during imaging on the microscope.

For colony-forming unit (CFU) assays, HeLa cells were infected as described above in six-well dishes in triplicates at an MOI of 100. After infection for the specified times, the media was removed, and HeLa cells were lysed by incubation in 0.1% Triton X-100 in water for 20 min at room temperature. To quantify bacteria in each infection, serial dilutions were plated on BHI plates, and CFUs were determined in technical triplicates.

## Analysis of cell lysates by protein electrophoresis and Western blotting

To generate *Listeria* lysates, the equivalent of 1 mL bacterial culture for O.D. at 600 nm of 0.5 was pelleted and resuspended in 40 µL lysozyme buffer (20% sucrose, 10 mg/mL lysozyme, 10 mM Tris (pH 8.0), 50 mM NaCl, 10 mM EDTA). The resuspended pellets were incubated at 55°C for 20 min. After addition of 10 µL of B-PER Bacterial Protein Extraction Reagent (Thermo Fisher Scientific), the samples were incubated at room temperature for 15 min. Each cell lysate was diluted 1:1 with 2× SDS-PAGE loading buffer and spun for 5 min to remove debris, and the supernatant was used for SDS-PAGE.

For SDS-PAGE, O.D. normalized *Listeria* lysates (10 µL of the lysates prepared as described above) were loaded per well. Protein samples were separated by SDS-PAGE on a 14% gel and stained by Coomassie according to standard protocols.

For Western blotting, the SDS-PAGE gel was transferred onto a polyvinylidene fluoride membrane and probed with primary and secondary antibody as outlined in Table S5. Immunoblots were developed with Amersham ECL Prime Western Blotting Detection Reagent (GE Healthcare Life Sciences, Pittsburgh, PA) and imaged on an ImageQuant LAS4000 imaging system (GE Healthcare Life Sciences).

## Cell fixation and immunofluorescence

At indicated time points postinfection, cells were fixed in 4% paraformaldehyde (PFA) in water for 10 min, rinsed in PBS, and permeabilized by

incubating in 0.2% Triton X-100 in PBS for 5 min. For preserving GFP-complementation fluorescence upon fixation, cells were fixed using 1% PFA and 1% sucrose in PBS, fixed for 20 min, and permeabilized using 0.1% Tween for 15 min. Cells were rinsed three times for 5 min each in PBS, and slides were blocked with 200 µL of 5% FBS in PBS for 20 min. After rinsing in PBS, slides were incubated with the primary antibody in 5% FBS in PBS. Dilutions and sources of all antibodies and stains are listed in Table S5. After rinsing in PBS three times, the slides were incubated with the secondary antibody in 5% FBS in PBS. Alexa 594-phalloidin or Coumarin-phalloidin for actin staining was added together with the secondary antibody. After incubation with the secondary antibody, slides were washed in PBS, rinsed in water, and mounted.

## Fluorescence microscopy

Unless otherwise indicated, all fluorescence images were acquired on a Nikon Ti-E widefield fluorescence microscope (Nikon, Tokyo, Japan) equipped with Nikon elements software, Ti-E perfect focus system, an iXon3 EMCCD camera (Andor, Belfast, UK), mercury arc lamp, DAPI (375/5 excitation, 400 dichroic, 470/12 emission), GFP (480/10 excitation, 490 dichroic, 510/10 emission) and mCherry (560/10 excitation, 585 dichroic, 610/25 emission) filter sets. External excitation and emission filter wheels were controlled by a Lambda 10-3 filter changer (Sutter Instruments, Novato, CA), and dichroic mirrors were placed on cubes in the dichroic turret. Images were collected using a 60× oil objective (NA 1.40) and exposures; EM gain settings and neutral density filter settings are listed in Table S6 for each data set in this study. Live cells were maintained at 37°C and 5% CO<sub>2</sub> in a LiveCell environment chamber (Pathology Devices, Westminster, MD) during the experiments. For time-course-infection experiments (Fig. 4 b), images were collected every 15 min.

For high throughput comparison of GFP complementation (Fig. 6), a Nikon Ti-E HCA widefield fluorescence microscope (Nikon) was used. This system was equipped with Nikon elements software, Ti-E perfect focus system, a digital CMOS camera (Hamamatsu Photonics, Hamamatsu, Japan), a Lumencor Spectra X light engine 500 mW solid-state light source, and DAPI (395 excitation, 475/20 emission), GFP (470 excitation, 540/21 emission), and brightfield-transmitted illumination using a PEKA light engine (Lumencor, Beaverton, OR). Images were collected using a Plan Apo λ 40× Ph2 DM air objective (NA 0.95). Images were acquired at 50% light intensity for 200 ms for each fluorescent or brightfield channel every 15 min over the time course of the experiment. Live cells were maintained at 37°C and 5% CO<sub>2</sub> in an Okolab cage incubator (Okolab, Burlingame, CA) during the experiment.

## RESULTS AND DISCUSSION

A series of *inlC* fusion constructs were generated to enable live-cell visualization of InlC in the context of infection of mammalian cells. We first fused the 11th strand of GFP with a flexible linker to the C-terminus of InlC (Fig. 1; see Table S3 for the tag sequence), analogous to a previous approach in which secreted effector proteins from the Gram-negative pathogen *Salmonella* were tagged with GFP11 (33–35). Production of the resulting nonfluorescent fusion protein was under control of the constitutive *Phyper* promoter on the multicopy plasmid pAT18 (12) (Fig. 1 b). This initial construct allowed for maximal protein production in *Listeria* to assess the feasibility of split-GFP complementation in the context of *Listeria* infections. The remainder of GFP (GFP1-10, see Table S4 for sequence information) is also nonfluorescent and was produced in



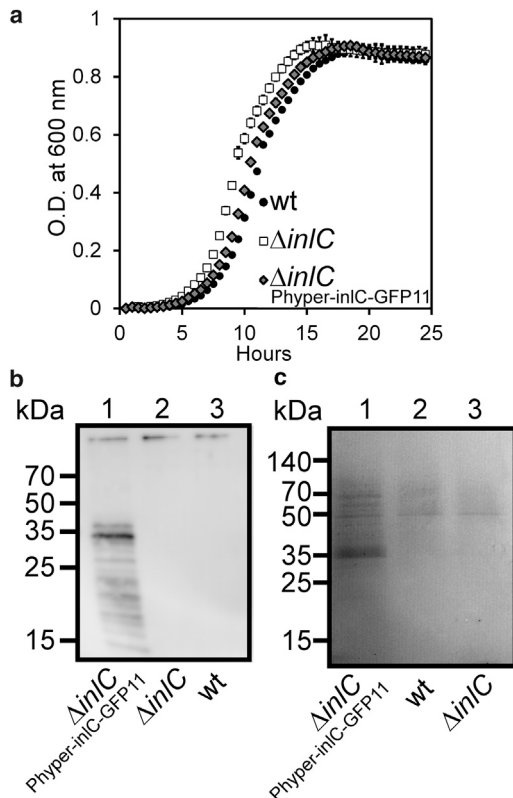

**FIGURE 2** Engineered strain  $\Delta inlC_{Phyper-inlC-GFP11}$  displays normal in vitro growth, protein secretion, and infectivity. (a) The growth curve of *Listeria* strains at 30°C is shown. Errors bars indicate STD from  $n = 3$  experiments. (b) An immunoblot of *Listeria* cell lysates after 25 h growth using a polyclonal anti-InlC antibody is shown. (c) A Coomassie-stained SDS-PAGE gel of secreted proteome of wt,  $\Delta inlC$ , and  $\Delta inlC_{Phyper-inlC-GFP11}$  strains collected by trichloroacetic acid precipitation of supernatants from *Listeria* cultures after 25 h growth is shown.

the mammalian host cell, as was done previously in *Salmonella* infection systems (33–35). Upon secretion of InlC-GFP11 in *Listeria* infection, the GFP11 portion of InlC-GFP11 is predicted to complement with GFP1-10, inducing complemented fluorescent InlC-GFP for visualization of InlC dynamics in the host cell (Fig. 1 a).

We first assessed whether production of tagged InlC from the pAT18 plasmid significantly alters *Listeria* growth. We compared the growth of wt (wild-type) *Listeria* and  $\Delta inlC$ , as well as a strain in which InlC was produced as a fusion with GFP11 from a plasmid ( $\Delta inlC_{Phyper-inlC-GFP11}$ , Fig. 2 a). The engineered strain displayed growth comparable to that of the wt strain, leading us to conclude that harboring the plasmid encoding for InlC fusions does not significantly affect cell growth, even in the case in which the InlC-GFP11 fusion is constitutively produced under control of the *Phyper* promoter.

Next, we assessed whether production of the fusion protein InlC-GFP11 from the pAT18 plasmid results in InlC secretion and whether the proteome secreted from *Listeria* is altered in strains harboring a plasmid. The supernatant of

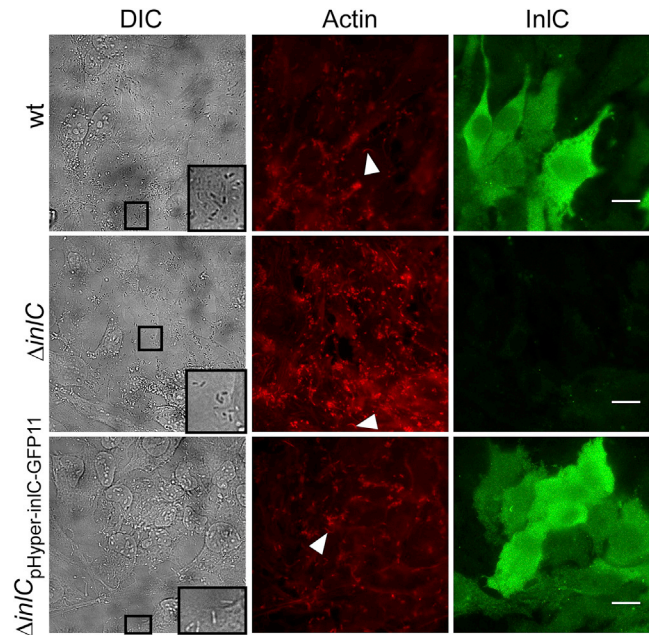

**FIGURE 3** Tagged InlC is produced and secreted into the HeLa host cell in the context of *Listeria* infection. HeLa cells were infected with the indicated strains, and cells were fixed 25 h postinfection. Actin was detected via Alexa 594-phalloidin, and InlC was detected by immunofluorescence using a polyclonal anti-InlC antibody (46) and an Alexa-Fluor-488-labeled secondary antibody. Representative *Listeria* cells are indicated in the insets in the DIC channel, and actin tails are indicated by arrows in the actin channel. Images are presented at the same intensity levels for each channel. Scale bars, 20  $\mu\text{m}$  (wt infection:  $n = 36$  infected cells total;  $\Delta inlC$ :  $n = 29$  infected cells total;  $\Delta inlC_{Phyper-inlC-GFP11}$ :  $n = 63$  infected cells total). To see this figure in color, go online.

overnight cultures of *Listeria* samples was precipitated with trichloroacetic acid and probed for the presence of the InlC protein using Western blotting via a polyclonal anti-InlC antibody (Fig. 2 b). No band was observed in the  $\Delta inlC$  strain or wt strain, as would be expected because in the wt strain, InlC is produced under control of its endogenous promoter, which is only active after *Listeria* has entered host cells (12,45). However, we observed a band around 35 kDa in the  $\Delta inlC_{Phyper-inlC-GFP11}$  strain, consistent with a size of 33.2 kDa for full-length InlC. We concluded that InlC was produced and secreted when under the control of the constitutive *Phyper* promoter. Whole protein samples of the culture supernatant were then analyzed on a Coomassie-stained SDS-PAGE gel (Fig. 2 c). A band appears around 35 kDa for strain  $\Delta inlC_{Phyper-inlC-GFP11}$  (lane 1), confirming production of InlC-GFP11 and in line with the Western blot analysis (Fig. 2 b). As seen for the Western blot, the 35 kDa band corresponding to InlC-GFP11 was absent in the wt strain and the  $\Delta inlC$  strains (lanes 2, 3). We observed bands of  $\sim 50$  and  $\sim 70$  kDa across all three strains tested. These bands presumably correspond to other secreted proteins and suggest that there is not a significant change in overall protein secretion in the  $\Delta inlC_{Phyper-inlC-GFP11}$  strain.

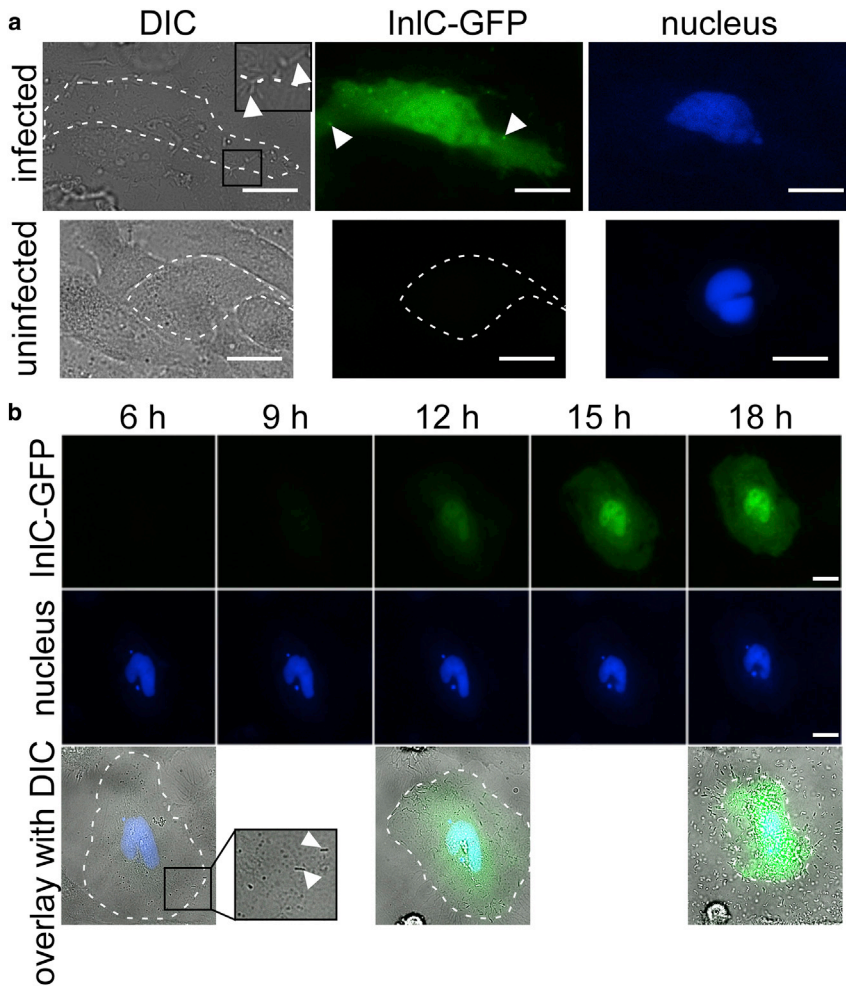

FIGURE 4 Split-GFP tagging of InIC during infection of epithelial cells. (a) Microscopy images of HeLa cells producing GFP1-10 (see Table S4 for sequence information) and a nuclear TagBFP transfection marker are shown. Shown are cells infected with  $\Delta inIC_{\text{PhyPer-inIC-GFP11}}$  (see Table S3 for tag sequence information) at 18 h postinfection (top panel, two experiments, 15 cells) and an uninfected control (bottom panel). Insets in DIC channel are examples of *Listeria*. Arrows in the InIC-GFP channel are examples of InIC cell membrane puncta. (b) Microscopy images of live HeLa at different time points postinfection with  $\Delta inIC_{\text{PhyPer-inIC-GFP11}}$  are shown. *Listeria* entered the cell shown here at 6 h postinfection (see arrows in DIC inset) and accumulate within the host cell throughout the time course. Cells were transfected to produce GFP1-10 and a nuclear transfection marker. Scale bars, 20  $\mu\text{m}$ . To see this figure in color, go online.

Bacterial strains harboring plasmids sometimes exhibit decreased infectivity (56). We compared bacterial load of the engineered strain  $\Delta inIC_{\text{PhyPer-inIC-GFP11}}$  with the wt and  $\Delta inIC$  strains at 7, 13, and 29 h postinfection (Fig. S2). To measure bacterial load, a CFU assay was performed in which HeLa cells were infected with each strain and CFUs were quantified at each time point. At 7 and 13 h, there was a slight decrease in bacterial load for strains harboring plasmids with tagged InIC compared to the wt and  $\Delta inIC$  strains, but at 29 h, the CFU count between engineered strains and both the wt and  $\Delta inIC$  control displayed no significant difference. This observation is in line with a previous finding in which no difference in the infectivity of cultured cells was observed for *Listeria monocytogenes* EGD  $\Delta inIC$  versus its wt parent (46). We concluded that infectivity in our cell infection assay is not significantly affected for our engineered strains.

To test whether tagging InIC with a fluorescent protein fragment affects secretion and/or localization phenotypes in infection, we carried out immunofluorescence against InIC in HeLa cells infected with different *Listeria* strains (Fig. 3). HeLa cells were infected with wt,  $\Delta inIC$ , and

$\Delta inIC_{\text{PhyPer-inIC-GFP11}}$  strains and fixed 25 h postinfection. *Listeria* are visible as small rods in the differential interference contrast (DIC) channel (Fig. 3, zoomed-in insets in DIC channel). Representative regions with comparable *Listeria* infection densities are presented for each strain (Fig. 3). Actin was labeled using red fluorescent phalloidin and localized to the rod-shaped *Listeria* cells (Fig. 3) because of the ability of *Listeria* cells to polymerize actin (11,22). As established in the literature (23,24), *Listeria* infection leads to characteristic actin tails (Fig. 3, arrows in red channel). InIC was visualized using an anti-InIC antibody (Fig. 3). InIC levels for wt and  $\Delta inIC_{\text{PhyPer-inIC-GFP11}}$  were comparable, whereas  $\Delta inIC$  produced only background green fluorescence signal, indicating successful secretion of InIC for wt and  $\Delta inIC_{\text{PhyPer-inIC-GFP11}}$ . InIC localized throughout the cytosol as seen previously (46,48,49). Together, we concluded that InIC secretion in the  $\Delta inIC_{\text{PhyPer-inIC-GFP11}}$  strain is comparable with secretion of endogenous InIC in the wt strain, and our engineered strain may be used to report on InIC dynamics within the host cell by our live-cell fluorescence complementation approach.

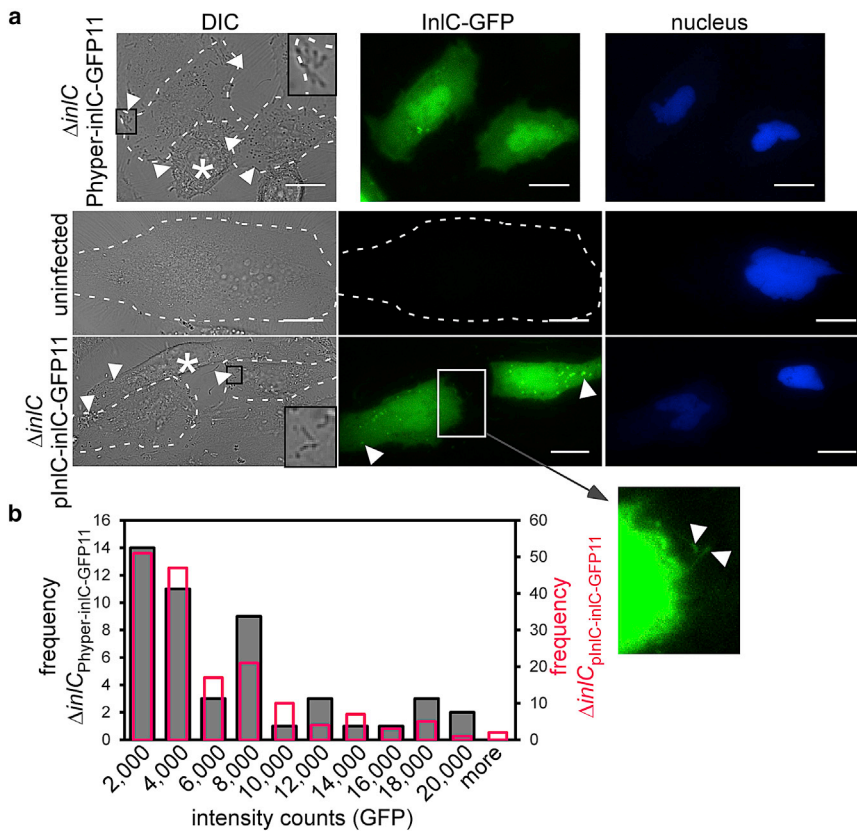

**FIGURE 5** Visualization of complemented InlC-GFP under control of different promoters. (a) HeLa cells were transfected with a plasmid to produce GFP1-10 (Table S4) and a nuclear TagBFP transfection marker and infected with indicated *Listeria* strains (see sequence information in Tables S2 and S3) for 24 h. Images in the GFP channel are presented at the same intensity levels. Arrows and insets in the DIC channel indicate *Listeria* cells. Stars in the DIC channel indicate cells that were infected but not transfected (confirmed by absence of the nuclear TagBFP marker). Arrows in the InlC-GFP channel for  $\Delta inlC_{pInlC-inlC-GFP11}$  indicate InlC membrane protrusions (as in Fig. 4). Scale bars, 20  $\mu$ m. The inset for  $\Delta inlC_{pInlC-inlC-GFP11}$  shows a contrast-enhanced image indicating elongated membrane protrusions. (b) The mean intensity in the GFP channel was quantified for individual cells 24 h postinfection using identical acquisition settings (gray filled bars:  $\Delta inlC_{Phyper-inlC-GFP11}$ ; three independent experiments, 48 cells; pink open bars:  $\Delta inlC_{pInlC-inlC-GFP11}$ ; two independent experiments, 168 cells). To see this figure in color, go online.

Although secreted *Listeria* proteins including InlC have been routinely visualized in fixed infections by immunofluorescence (46,48–50), no tools have been applied to track virulence proteins in live infections. To determine whether the split-GFP system can be used to track secreted InlC, HeLa cells were transfected with DNA encoding for GFP1-10 before *Listeria* infection (see Table S4 for the protein sequence of GFP1-10). The plasmid encoding GFP1-10 included a transfection marker producing nuclear TagBFP. Fig. 4 presents the results of cells that were transfected with GFP1-10 and infected with  $\Delta inlC_{Phyper-inlC-GFP11}$  (see Table S3 for tag sequence details). *Listeria* infections were observed in the DIC channel via the distinct rod-like shape of the bacteria (Fig. 4 a, inset). Green fluorescence signal was detected in HeLa cells infected with the  $\Delta inlC_{Phyper-inlC-GFP11}$  strain but not for an uninfected control (Fig. 4 a). These results confirm complementation of GFP1-10 and GFP11 upon InlC-GFP11 secretion during *Listeria* infection. We observed diffuse cytosolic signal of the complemented InlC-GFP (Fig. 4 a), in line with cytosolic InlC signal detected by immunofluorescence by us (Fig. 3) and others (46,48,49). Interestingly, studies in the literature also report localization of InlC at cell protrusions that form during *Listeria* cell-to-cell spread (49). We observed similar protrusions that appear as brighter green puncta in live cells (Fig. 4 a) and occasionally in fixed immuno-

fluorescence images (Fig. S3, arrow). The complemented GFP fluorescence could be preserved upon fixation, and the pattern of localization generally matched the fluorescence signal from anti-InlC immunofluorescence (Fig. S4). When InlC puncta were visible in IF images (via GFP comp or anti-InlC), they were juxtaposed with *Listeria* (detected via DIC) and actin bundles (detected via phalloidin), consistent with the suggestion that InlC may promote cell-to-cell spreading (Fig. S4). Together, we conclude that our split-GFP tagging system reports on InlC localization and resembles localization patterns of endogenous InlC.

Because the split-GFP system enables time-resolved visualization of tagged protein dynamics, we monitored GFP fluorescence for several hours during infection of epithelial cells (Fig. 4 b). HeLa cells were transfected with GFP1-10 including the nuclear TagBFP transfection marker and infected with the strain  $\Delta inlC_{Phyper-inlC-GFP11}$ . Because *Listeria* infections are heterogeneous both in space and time, it is often difficult to track infection progression in a bulk assay. The time course presented in Fig. 4 b shows *Listeria* that enter a single HeLa cell at 6 h postinfection (see DIC inset in Fig. 4 b), precisely indicating the infection starting point. We monitored the GFP channel for 12 h past this time point and observed an increase of the green fluorescence signal in the cytosol and nucleus, in line with intracellular accumulation of InlC. As seen with Western blot



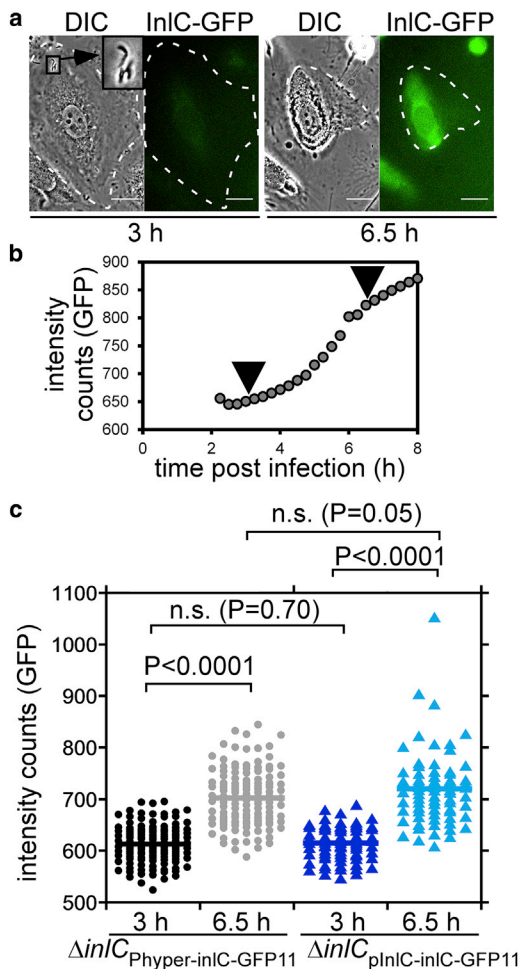

**FIGURE 6** High throughput quantification of GFP complementation during *Listeria* infection. (a) HeLa cells were infected with  $\Delta inlC_{Phy\text{per-inlC-GFP11}}$  and  $\Delta inlC_{pInlC-inlC-GFP11}$  side by side, and infections were visualized over time in parallel in the same experimental setup. A representative infection ( $\Delta inlC_{pInlC-inlC-GFP11}$ ) at 3 h postinfection (left panel) vs. 6.5 h postinfection (right panel) is shown. The inset indicates examples of *Listeria* cells in the DIC channel. Scale bars, 20  $\mu\text{m}$ . Images in the GFP channel are presented at the same intensity levels. (b) Quantification of GFP fluorescence intensity for the time course shown in (a) is given. The arrows indicate 3 and 6.5 h postinfection. (c) The mean GFP fluorescence signal for all cells in the experiment was determined at 3 h postinfection vs. 6.5 h postinfection (one experiment;  $n = 128$  cells for  $\Delta inlC_{Phy\text{per-inlC-GFP11}}$  and  $n = 75$  cells for  $\Delta inlC_{pInlC-inlC-GFP11}$ ). Statistical significance was determined using a Tukey honest significant difference ANOVA test. To see this figure in color, go online.

assays in the literature (46), high levels of InIC accumulated late in the infection process, leading us to conclude that our split-GFP approach is suitable for spatiotemporal resolution of secreted proteins in infection.

We next assessed InIC-visualization in live infections when the InIC-GFP11 fusion was produced from the endogenous *inlC* promoter to closer mimic the wt *Listeria* strain. For a direct comparison between the *inlC* and *Phy* promoters, we infected HeLa cells transfected with GFP1-10 (Table S4) with strains  $\Delta inlC_{Phy\text{per-inlC-GFP11}}$  and

$\Delta inlC_{pInlC-inlC-GFP11}$  side by side for 24 h (Fig. 5, see Tables S2 and S3 for sequence information of the promoters and tags). As seen before with  $\Delta inlC_{Phy\text{per-inlC-GFP11}}$  (Fig. 4), we observed diffuse cytosolic signal in the GFP channel for both strains (Fig. 5 a), confirming successful complementation of GFP1-10 with InIC-GFP11. No GFP fluorescence was seen for infected cells that were not transfected with GFP1-10, confirmed by the absence of the nuclear TagBFP marker (Fig. 5 a, stars in DIC images). As before (Fig. 4 a), we observed bright green puncta in the GFP channel in addition to cytosolic GFP fluorescence (Fig. 5 a, arrows in GFP channel). These likely represent protrusions from *Listeria* during cell-to-cell spread as observed by others (49) and by us in immunofluorescence images (Fig. S3 arrow, Fig. S4 inset). Occasionally, we also observed elongated protrusions in the *xy* plane in the GFP channel (Fig. 5 a, contrast enhanced inset). We concluded that these structures also represent membrane protrusions as *Listeria* spreads from cell to cell. To directly confirm that the GFP signal after complementation corresponds to signal from InIC, we repeated the complementation experiment with  $\Delta inlC_{pInlC-inlC-GFP11}$ , fixed cells, and performed immunofluorescence against InIC (Fig. S4, a and b). Both the overall fluorescence pattern, as well as protrusions at the cell membrane (Fig. S4 a), overlapped for the signal from complemented GFP and InIC. Overall, usage of the endogenous *inlC* promoter and the *Phy* promoter resulted in comparable phenotypic GFP complementation patterns.

For a quantitative comparison of the *inlC* and *Phy* promoters, we compared the mean cytosolic fluorescence signal in each infected cell for  $\Delta inlC_{Phy\text{per-inlC-GFP11}}$  and  $\Delta inlC_{pInlC-inlC-GFP11}$  at 24 h postinfection (Fig. 5 b). The mean fluorescence intensity for both strains was comparable (average fluorescence intensity in arbitrary units of 5878 counts for  $\Delta inlC_{Phy\text{per-inlC-GFP11}}$  vs. 5031 counts for  $\Delta inlC_{pInlC-inlC-GFP11}$ ). Median counts were 3411 vs. 3239, respectively. Similarly, although the distribution of intensities between cells was heterogeneous and spanned an order of magnitude for both strains, no difference in intensity distribution was apparent (Fig. 5 b). For an additional robust comparison of the *inlC* and *Phy* promoters, we infected HeLa cells with the  $\Delta inlC_{Phy\text{per-inlC-GFP11}}$  vs.  $\Delta inlC_{pInlC-inlC-GFP11}$  strain and visualized infection and GFP complementation on a high-content analysis microscope (Fig. 6). This experimental setup allowed for parallel imaging of both infections at the same time. The HeLa cell line stably produced GFP1-10 (Table S4) and the nuclear TagBFP marker (34). We quantified GFP fluorescence at two time points during the time course, 3 h postinfection vs. 6.5 h postinfection. As expected, fluorescence counts increased over time for both strains (Fig. 6 c). However, no statistically significant difference in GFP intensity was observed when comparing the two strains at each time point. Although the *Phy* promoter is strong and induces constitutive protein expression (12), the *inlC* promoter is only



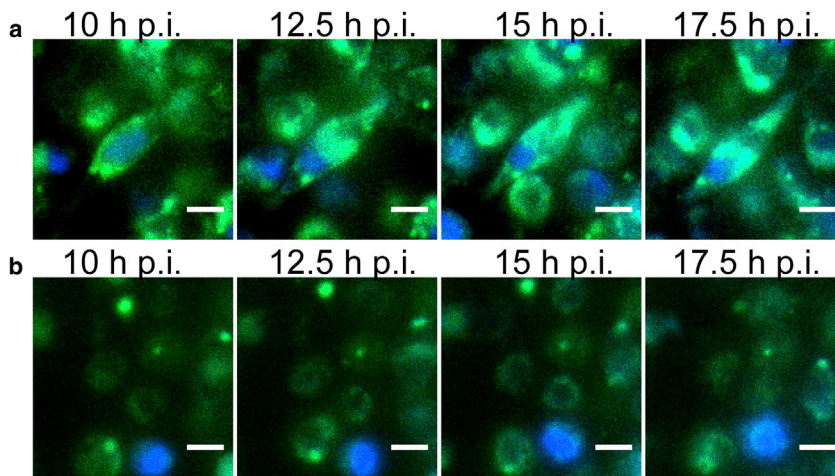

FIGURE 7 BMDMs expressing GFP1-10 and the nuclear TagBFP infected with  $\Delta inlC_{pInlC-inlC-GFP11}$ . GFP complementation signal increases over the course of infection for infected cells (a) but not for uninfected cells (b). The fluorescence signal was adjusted to have the same thresholds for (a) and (b). GFP complementation may accumulate in nontransfected cells as macrophages consume other transfected and infected cells. Scale bars, 20  $\mu$ m. To see this figure in color, go online.

active in infection for high level InlC production (12,45). This indicates that both promoter strengths produce comparable translocated InlC levels in our experimental conditions (Figs. 5 and 6). We concluded that the *Phyber* promoter may serve as a robust promoter for split-GFP tagging of secreted proteins from *Listeria* and that the system is compatible with using endogenous promoters as well.

In addition to infecting epithelial cells, *Listeria* also infects macrophages. We recently demonstrated that split-GFP could be used to track *Salmonella* effector proteins translocated into primary BMDMs (34). To assess whether the system could also be used to monitor *Listeria* effectors, we transfected BMDMs with GFP1-10 and the nuclear TagBFP and infected them with  $\Delta inlC_{pInlC-inlC-GFP11}$ . Cells containing GFP1-10 are readily identified via blue nuclear marker expressed from an internal ribosome entry site from the GFP1-10 plasmid. As observed for *Salmonella*, the fluorescence complementation signal is weaker than in HeLa cells, but is significantly above the background fluorescence (Fig. 7). Because BMDMs in culture are phagocytic, InlC localization is not strictly cytosolic, and the protein seems to accumulate in phagosome and early lysosomes. This system can be used to track *Listeria* effectors in this physiologically relevant model system.

Although split-GFP tagging for secreted bacterial proteins in infection has been used previously in *Salmonella* infections (33–35), usage of split-fluorescent proteins of different colors would allow for broad flexibility in multicolor fluorescent imaging assays. Our *Listeria* expression plasmid is modular, and the split-fluorescent protein tag can be exchanged easily (Fig. 1 b). Guided by the recent optimization of split mNeonGreen and split super-folder Cherry (52,57), we exchanged the GFP11 tag with the 11th strand of mNeonGreen (called here mNG11, derived from mNG2 in (52)) and the 11th strand of super-folder Cherry (called here sfCh11, derived from sfCherry2 in (52), see Table S3 for sequence information of mNG11 and sfCh11). Both InlC fusions were produced under control of the *inlC* promoter (Table S2). We transfected HeLa

cells with sfCh1-10, encoding for the nonfluorescent strands 1–10 of super-folder Cherry (see Table S4 for sequence information), followed by infection with  $\Delta inlC_{pInlC-inlC-sfCh11}$  for 24 h. As expected for a 24 h infection, all HeLa cells in the field of view presented in Fig. 8 a were infected with *Listeria* (Fig. 8 a, inset and arrows in DIC channel). We observed fluorescence above background in the red fluorescent channel for some cells, consistent with complementation of sfCh11 and sfCh1-10. Some infected cells were nonfluorescent, in line with the assumption that not all cells were transfected with sfCh1-10 (Fig. 8 a, stars in DIC channel indicate infected cells without red fluorescence). Note that sfCh1-10 and mNG1-10 do not include a transfection marker as does GFP1-10. As seen for split-GFP (Figs. 4 and 5), the red fluorescence signal was diffusely distributed throughout the cytosol, and we also observed fluorescent puncta (Fig. 8 a, arrow in InlC-sfCh channel) that resemble cell protrusions found during *Listeria* cell-to-cell spread. To assess complementation of mNeonGreen, HeLa cells were transfected with DNA encoding for the nonfluorescent mNG1-10 (see Table S4 for sequence information) and infected with  $\Delta inlC_{pInlC-inlC-mNG11}$  for 24 h. As for GFP and super-folder Cherry complementation, we readily observed infected HeLa cells displaying bright green fluorescence throughout the cytosol, indicating successful complementation (Fig. 8 b). We also observed bright puncta (Fig. 8 b, arrow in InlC-mNG channel) as observed for GFP and super-folder Cherry complementation, resembling cell protrusions during *Listeria* spread. Together, we concluded that tagging secreted *Listeria* proteins with split-fluorescent proteins is highly modular and compatible with proteins of different fluorescent colors, including GFP, mNeonGreen, and super-folder Cherry.

## CONCLUSIONS

Visualization of secreted virulence proteins in bacterial infections on a single-cell level is a powerful tool to gain

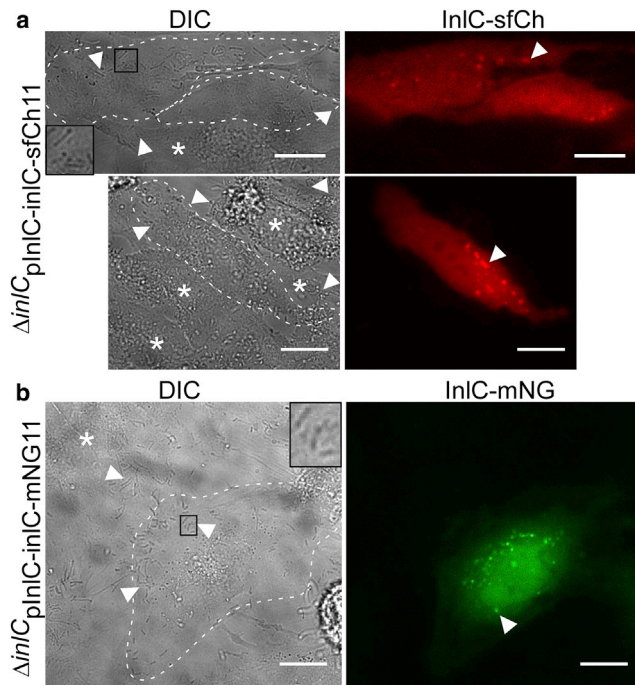

**FIGURE 8** Visualization of InIC via super-folder Cherry and mNeonGreen complementation in infection. (a) HeLa cells were transfected with sfCh1-10 (see Table S4 for sequence information) and infected with  $\Delta inIC_{pInIC-inIC-sfCh11}$  (see Tables S2 and S3 for promoter and tag sequence information) for 24 h. Shown are two representative fields of view with sfCh signal above background. Raw fluorescence counts above background are variable (upper panel:  $\sim 2000$  cytosolic counts, lower panel:  $\sim 8000$  cytosolic counts). Stars mark infected cells that display background sfCh counts and were presumably not transfected with sfCh1-10 (typical background counts:  $< 1000$ ). Arrows and inset in the DIC channel point to *Listeria*. Arrows in the InIC-sfCh channel indicate InIC cell protrusions as in Figs. 4 and 5. Scale bars, 20  $\mu\text{m}$  (two experiments, 10 cells). (b) HeLa cells were transfected with the nonfluorescent mNG1-10 (see Table S4 for sequence information) and infected with  $\Delta inIC_{pInIC-inIC-mNG11}$  (see Tables S2 and S3 for promoter and tag information) for 24 h. Arrows and inset in the DIC channel indicate *Listeria* cells, and the star in the DIC channel indicates a HeLa cell that is infected but displays background green fluorescence signal. The arrow in the InIC-mNG channel indicates bright puncta presumably corresponding to cell protrusions during *Listeria* cell-to-cell spread. Scale bars, 20  $\mu\text{m}$  (two experiments, 16 cells). To see this figure in color, go online.

insights into the spatiotemporal dynamics of the complex infection process. We have here demonstrated a proof of principle application of tagging the secreted protein InIC from *Listeria* in epithelial cells and primary macrophages. InIC localization and accumulation throughout the infection can be readily quantified, while also capturing the heterogeneity of the infection between different cells. The split-fluorescent protein tagging strategy features a short and unstructured peptide tag—the 11th strand of different fluorescent proteins—therefore minimizing potential interference with the endogenous protein secretion process. Importantly, we have demonstrated usage of three different split-fluorescent proteins (GFP, mNeonGreen, and super-folder Cherry), allowing tagging with two spectrally diverse

fluorescent proteins. This flexibility will allow for multicolor imaging in the future, in which other host and/or pathogen components can be tagged simultaneously by other fluorescent markers.

Usage of the endogenous *inIC* promoter and a strong general promoter (*Phyfer*) confirm that the system established here may be broadly used for secreted *Listeria* proteins, either with their endogenous promoters or with the *Phyfer* promoter for robust protein production. We envision usage of this technology for chromosomally integrated fusion proteins or with weaker promoters will be possible for the following reasons. First, the contrast of our images is high (up to 20,000 counts in complementation versus less than 1000 counts in the background, Fig. 5). Additionally, contrast may be improved by using multiple copies of the fluorescent protein tag (52), as was done before for *Salmonella* effector tagging (34). Together, this platform is robust and represents a versatile tool to gain insights in *Listeria* infection biology.

We envision that split-fluorescent protein tagging of secreted proteins can be widely applicable in diverse biological contexts. Our previous work on labeling secreted effector proteins from *Salmonella* (34,35) was limited to tagging proteins secreted by the type III secretion mechanism, a specialized secretion pathway for virulence proteins in Gram-negative bacteria (41). The application in *Listeria* secretion demonstrates compatibility with the Sec secretion pathway, a general and ubiquitous secretion pathway in all bacteria with more than one third of the bacterial proteome as clients (58). Besides in-depth investigations of diverse bacterial infections in different mammalian cell systems, dynamic visualization of secreted proteins may be used for various other applications including biofilm formation, labeling of cell wall or membrane proteins, or synthetic biology systems. Lastly, the evolutionary similarity between the bacterial Sec secretion system and mammalian secretion systems in organelles (59) suggests that the split-fluorescent technology may be used to investigate mammalian secretion systems as well.

There are a number of important considerations for using split-fluorescent protein systems. Tagging a protein of interest with the 11th strand of a fluorescent protein (Table S3) is limited to terminal tags, ideally at the C-terminus to avoid interfering with an N-terminal signal sequence. Depending on each protein's function, C-terminal tagging may interfere with its function, and each protein of interest must be evaluated for this potential problem, a general caveat of fluorescent protein tagging (60). Moreover, complementation of GFP in the context of infection takes at least 2 h (35), limiting the time resolution of detection for early secretion events. Therefore, this technology may be particularly useful for tagging of virulence proteins that accumulate later in the infection, as is the case for InIC. Additionally, we produced tagged InIC from a high-copy plasmid, resulting in overexpression of the fusion. Although our proof of

principle live InC imaging produced results consistent with fixed literature results, subtler biologically relevant phenotypes may be extracted when the tagged virulence protein is integrated in the genome. Finally, the overall brightness of split-fluorescent protein systems is typically less than parent fluorescent proteins, super-folder GFP, mNeonGreen, and super-folder Cherry2. In *E. coli*, the GFP1-10 system was ~90% as bright as super-folder GFP, the split mNeonGreen system was ~60% the fluorescence of mNeonGreen, and split super-folder mCherry2 was equal to the fluorescence of super-folder mCherry (52). In these cases, the 1–10 portion was fused to the 11th strand via a spacer, so whether these numbers accurately reflect the achievable brightness when the two components are expressed in *trans* is unclear.

## SUPPORTING MATERIAL

Four figures and six tables are available at [http://www.biophysj.org/biophysj/supplemental/S0006-3495\(18\)30382-5](http://www.biophysj.org/biophysj/supplemental/S0006-3495(18)30382-5).

## AUTHOR CONTRIBUTIONS

D.B., E.B., and A.E.P. designed research. D.B., E.B., M.M., and D.M.T.N. performed research. D.B., E.B., M.M., and D.M.T.N. analyzed data. P.C. contributed reagents and experimental advice. D.B., E.B., and A.E.P. wrote the manuscript.

## ACKNOWLEDGMENTS

We thank Fabrizia Stavru for experimental advice.

Plasmids to produce strands 1–10 of mNeonGreen and super-folder Cherry were a generous gift of Professor Bo Huang (University of California San Francisco). We acknowledge financial support from the Human Frontiers Science Project. D.M.T.N. was supported by the NSF IGERT grant #1144807.

## REFERENCES

- Hamon, M., H. Bierne, and P. Cossart. 2006. *Listeria monocytogenes*: a multifaceted model. *Nat. Rev. Microbiol.* 4:423–434.
- Portnoy, D. A., V. Auerbuch, and I. J. Glomski. 2002. The cell biology of *Listeria monocytogenes* infection: the intersection of bacterial pathogenesis and cell-mediated immunity. *J. Cell Biol.* 158:409–414.
- Lebreton, A., F. Stavru, and P. Cossart. 2015. Organelle targeting during bacterial infection: insights from *Listeria*. *Trends Cell Biol.* 25:330–338.
- Rolhion, N., and P. Cossart. 2017. How the study of *Listeria monocytogenes* has led to new concepts in biology. *Future Microbiol.* 12:621–638.
- Cossart, P., and A. Lebreton. 2014. A trip in the “New Microbiology” with the bacterial pathogen *Listeria monocytogenes*. *FEBS Lett.* 588:2437–2445.
- Disson, O., and M. Lecuit. 2013. In vitro and in vivo models to study human listeriosis: mind the gap. *Microbes Infect.* 15:971–980.
- D’Orazio, S. E. 2014. Animal models for oral transmission of *Listeria monocytogenes*. *Front. Cell. Infect. Microbiol.* 4:15.
- Cossart, P. 2011. Illuminating the landscape of host-pathogen interactions with the bacterium *Listeria monocytogenes*. *Proc. Natl. Acad. Sci. USA.* 108:19484–19491.
- Birmingham, C. L., V. Canadien, ..., J. H. Brumell. 2008. Listeriolysin O allows *Listeria monocytogenes* replication in macrophage vacuoles. *Nature.* 451:350–354.
- Helaine, S., and D. W. Holden. 2013. Heterogeneity of intracellular replication of bacterial pathogens. *Curr. Opin. Microbiol.* 16:184–191.
- Tilney, L. G., and D. A. Portnoy. 1989. Actin filaments and the growth, movement, and spread of the intracellular bacterial parasite, *Listeria monocytogenes*. *J. Cell Biol.* 109:1597–1608.
- Balestrino, D., M. A. Hamon, ..., A. Toledo-Arana. 2010. Single-cell techniques using chromosomally tagged fluorescent bacteria to study *Listeria monocytogenes* infection processes. *Appl. Environ. Microbiol.* 76:3625–3636.
- Desvaux, M., and M. Hébraud. 2006. The protein secretion systems in *Listeria*: inside out bacterial virulence. *FEMS Microbiol. Rev.* 30:774–805.
- Camejo, A., F. Carvalho, ..., D. Cabanes. 2011. The arsenal of virulence factors deployed by *Listeria monocytogenes* to promote its cell infection cycle. *Virulence.* 2:379–394.
- Renier, S., P. Micheau, ..., M. Desvaux. 2012. Subcellular localization of extracytoplasmic proteins in monoderm bacteria: rational secretomics-based strategy for genomic and proteomic analyses. *PLoS One.* 7:e42982.
- Bierne, H., and P. Cossart. 2007. *Listeria monocytogenes* surface proteins: from genome predictions to function. *Microbiol. Mol. Biol. Rev.* 71:377–397.
- Lenz, L. L., and D. A. Portnoy. 2002. Identification of a second *Listeria secA* gene associated with protein secretion and the rough phenotype. *Mol. Microbiol.* 45:1043–1056.
- Renier, S., C. Chambon, ..., M. Desvaux. 2013. Exoproteomic analysis of the SecA2-dependent secretion in *Listeria monocytogenes* EGD-e. *J. Proteomics.* 80:183–195.
- Dumas, E., M. Desvaux, ..., M. Hébraud. 2009. Insight into the core and variant exoproteomes of *Listeria monocytogenes* species by comparative subproteomic analysis. *Proteomics.* 9:3136–3155.
- Prokop, A., E. Gouin, ..., O. Dussurget. 2017. OrfX, a nucleomodulin required for *Listeria monocytogenes* virulence. *MBio.* 8:e01550-17.
- Lebreton, A., G. Lakisic, ..., H. Bierne. 2011. A bacterial protein targets the BAHD1 chromatin complex to stimulate type III interferon response. *Science.* 331:1319–1321.
- Dabiri, G. A., J. M. Sanger, ..., F. S. Southwick. 1990. *Listeria monocytogenes* moves rapidly through the host-cell cytoplasm by inducing directional actin assembly. *Proc. Natl. Acad. Sci. USA.* 87:6068–6072.
- Welch, M. D., A. Iwamatsu, and T. J. Mitchison. 1997. Actin polymerization is induced by Arp2/3 protein complex at the surface of *Listeria monocytogenes*. *Nature.* 385:265–269.
- Gouin, E., M. D. Welch, and P. Cossart. 2005. Actin-based motility of intracellular pathogens. *Curr. Opin. Microbiol.* 8:35–45.
- Travier, L., S. Guadagnini, ..., M. Lecuit. 2013. ActA promotes *Listeria monocytogenes* aggregation, intestinal colonization and carriage. *PLoS Pathog.* 9:e1003131.
- Travier, L., and M. Lecuit. 2014. *Listeria monocytogenes* ActA: a new function for a ‘classic’ virulence factor. *Curr. Opin. Microbiol.* 17:53–60.
- Kayal, S., and A. Charbit. 2006. Listeriolysin O: a key protein of *Listeria monocytogenes* with multiple functions. *FEMS Microbiol. Rev.* 30:514–529.
- Cossart, P., M. F. Vicente, ..., P. Berche. 1989. Listeriolysin O is essential for virulence of *Listeria monocytogenes*: direct evidence obtained by gene complementation. *Infect. Immun.* 57:3629–3636.
- Schnupf, P., and D. A. Portnoy. 2007. Listeriolysin O: a phagosome-specific lysin. *Microbes Infect.* 9:1176–1187.



30. Hamon, M. A., D. Ribet, ..., P. Cossart. 2012. Listeriolysin O: the Swiss army knife of *Listeria*. *Trends Microbiol.* 20:360–368.
31. Hamon, M. A., E. Batsché, ..., P. Cossart. 2007. Histone modifications induced by a family of bacterial toxins. *Proc. Natl. Acad. Sci. USA.* 104:13467–13472.
32. Stavru, F., A. E. Palmer, ..., P. Cossart. 2013. Atypical mitochondrial fission upon bacterial infection. *Proc. Natl. Acad. Sci. USA.* 110:16003–16008.
33. McQuate, S. E., A. M. Young, ..., A. E. Palmer. 2017. Long-term live-cell imaging reveals new roles for *Salmonella* effector proteins SseG and SteA. *Cell. Microbiol.* 19:e12641.
34. Young, A. M., M. Minson, ..., A. E. Palmer. 2017. Optimized fluorescence complementation platform for visualizing *Salmonella* effector proteins reveals distinctly different intracellular niches in different cell types. *ACS Infect. Dis.* 3:575–584.
35. Van Engelenburg, S. B., and A. E. Palmer. 2010. Imaging type-III secretion reveals dynamics and spatial segregation of *Salmonella* effectors. *Nat. Methods.* 7:325–330.
36. Van Engelenburg, S. B., and A. E. Palmer. 2008. Quantification of real-time *Salmonella* effector type III secretion kinetics reveals differential secretion rates for SopE2 and SptP. *Chem. Biol.* 15:619–628.
37. Van Engelenburg, S. B., T. Nahreini, and A. E. Palmer. 2010. FACS-based selection of tandem tetracysteine peptides with improved ReAsH brightness in live cells. *ChemBioChem.* 11:489–493.
38. Gawthorne, J. A., L. Audry, ..., A. J. Roe. 2016. Visualizing the translocation and localization of bacterial type III effector proteins by using a genetically encoded reporter system. *Appl. Environ. Microbiol.* 82:2700–2708.
39. Enninga, J., J. Mounier, ..., G. Tran Van Nhieu. 2005. Secretion of type III effectors into host cells in real time. *Nat. Methods.* 2:959–965.
40. Young, A. M., and A. E. Palmer. 2017. Methods to illuminate the role of *Salmonella* effector proteins during infection: a review. *Front. Cell. Infect. Microbiol.* 7:363.
41. Moest, T. P., and S. Méresse. 2013. *Salmonella* T3SSs: successful mission of the secret(ion) agents. *Curr. Opin. Microbiol.* 16:38–44.
42. Engelbrecht, F., S. K. Chun, ..., Z. Sokolovic. 1996. A new PrfA-regulated gene of *Listeria monocytogenes* encoding a small, secreted protein which belongs to the family of internalins. *Mol. Microbiol.* 21:823–837.
43. de las Heras, A., R. J. Cain, ..., J. A. Vázquez-Boland. 2011. Regulation of *Listeria* virulence: PrfA master and commander. *Curr. Opin. Microbiol.* 14:118–127.
44. Rajabian, T., B. Gavicherla, ..., K. Ireton. 2009. The bacterial virulence factor InlC perturbs apical cell junctions and promotes cell-to-cell spread of *Listeria*. *Nat. Cell Biol.* 11:1212–1218.
45. Toledo-Arana, A., O. Dussurget, ..., P. Cossart. 2009. The *Listeria* transcriptional landscape from saprophytism to virulence. *Nature.* 459:950–956.
46. Gouin, E., M. Adib-Conquy, ..., P. Cossart. 2010. The *Listeria* monocytogenes InlC protein interferes with innate immune responses by targeting the I $\kappa$ B kinase subunit IKK $\alpha$ . *Proc. Natl. Acad. Sci. USA.* 107:17333–17338.
47. Polle, L., L. A. Rigano, ..., W. D. Schubert. 2014. Structural details of human tuba recruitment by InlC of *Listeria monocytogenes* elucidate bacterial cell-cell spreading. *Structure.* 22:304–314.
48. Kühbacher, A., M. Emmenlauer, ..., J. Pizarro-Cerdá. 2015. Genome-wide siRNA screen identifies complementary signaling pathways involved in *Listeria* infection and reveals different actin nucleation mechanisms during *Listeria* cell invasion and actin comet tail formation. *MBio.* 6:e00598–e15.
49. Kühbacher, A., E. Gouin, ..., J. Pizarro-Cerdá. 2013. Imaging InlC secretion to investigate cellular infection by the bacterial pathogen *Listeria monocytogenes*. *J. Vis. Exp.* 79:e51043.
50. Samba-Louaka, A., J. M. Pereira, ..., P. Cossart. 2014. *Listeria* monocytogenes dampens the DNA damage response. *PLoS Pathog.* 10:e1004470.
51. Glaser, P., L. Frangeul, ..., P. Cossart. 2001. Comparative genomics of *Listeria* species. *Science.* 294:849–852.
52. Feng, S., S. Sekine, ..., B. Huang. 2017. Improved split fluorescent proteins for endogenous protein labeling. *Nat. Commun.* 8:370.
53. Nakamura, Y., T. Gojobori, and T. Ikemura. 2000. Codon usage tabulated from international DNA sequence databases: status for the year 2000. *Nucleic Acids Res.* 28:292.
54. Clarke, T. F., IV, and P. L. Clark. 2008. Rare codons cluster. *PLoS One.* 3:e3412.
55. Silva-Herzog, E., and C. S. Detweiler. 2010. *Salmonella* enterica replication in hemophagocytic macrophages requires two type three secretion systems. *Infect. Immun.* 78:3369–3377.
56. Knodler, L. A., A. Bestor, ..., O. Steele-Mortimer. 2005. Cloning vectors and fluorescent proteins can significantly inhibit *Salmonella* enterica virulence in both epithelial cells and macrophages: implications for bacterial pathogenesis studies. *Infect. Immun.* 73:7027–7031.
57. Kamiyama, D., S. Sekine, ..., B. Huang. 2016. Versatile protein tagging in cells with split fluorescent protein. *Nat. Commun.* 7:11046.
58. Tsigotaki, A., J. De Geyter, ..., S. Karamanou. 2017. Protein export through the bacterial Sec pathway. *Nat. Rev. Microbiol.* 15:21–36.
59. Kunze, M., and J. Berger. 2015. The similarity between N-terminal targeting signals for protein import into different organelles and its evolutionary relevance. *Front. Physiol.* 6:259.
60. Specht, E. A., E. Braselmann, and A. E. Palmer. 2017. A critical and comparative review of fluorescent tools for live-cell imaging. *Annu. Rev. Physiol.* 79:93–117.
61. Yang, F., L. G. Moss, and G. N. Phillips, Jr. 1996. The molecular structure of green fluorescent protein. *Nat. Biotechnol.* 14:1246–1251.

**Biophysical Journal, Volume 114**

**Supplemental Information**

**A Multicolor Split-Fluorescent Protein Approach to Visualize *Listeria*  
Protein Secretion in Infection**

**Dilara Batan, Esther Braselmann, Michael Minson, Dieu My Thanh Nguyen, Pascale Cossart, and Amy E. Palmer**

## A multicolor split-fluorescent protein approach to visualize *Listeria* protein secretion in infection

### Supplementary Information

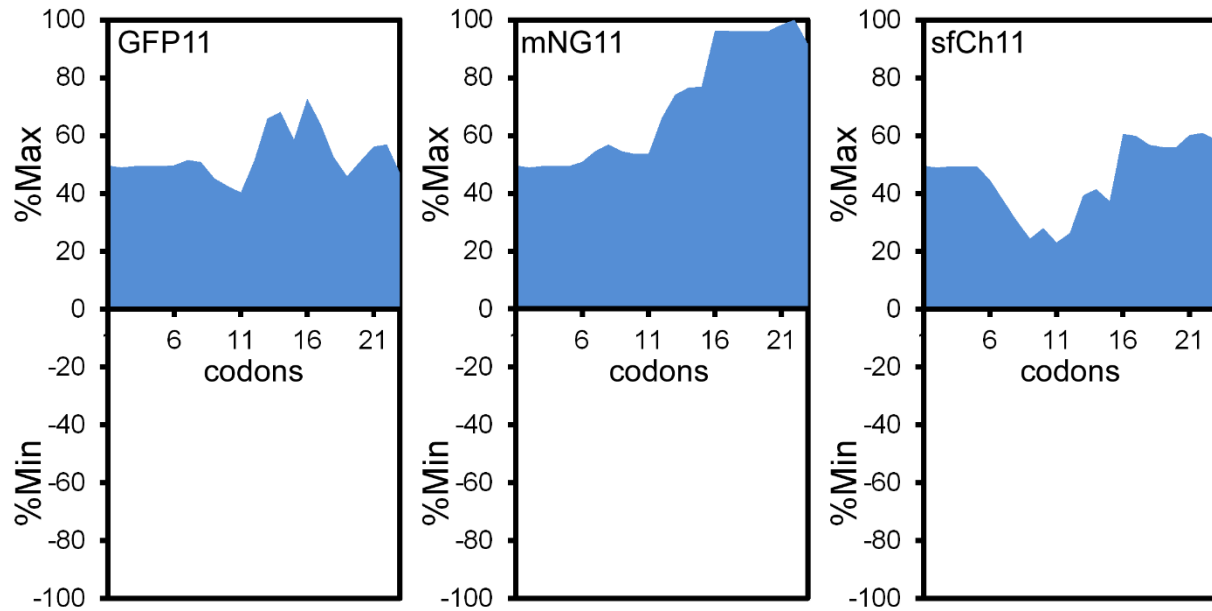

**Figure S1:** Codon usage for *Listeria monocytogenes* in split fluorescent protein tags. Codon usage in designed tags (see Table S3) were analyzed with the %MinMax algorithm (54), where codon usage is analyzed for a sliding window across the sequence. Positive values (%Max) indicate usage of common codons, whereas negative values (%Min) indicate rare codons.



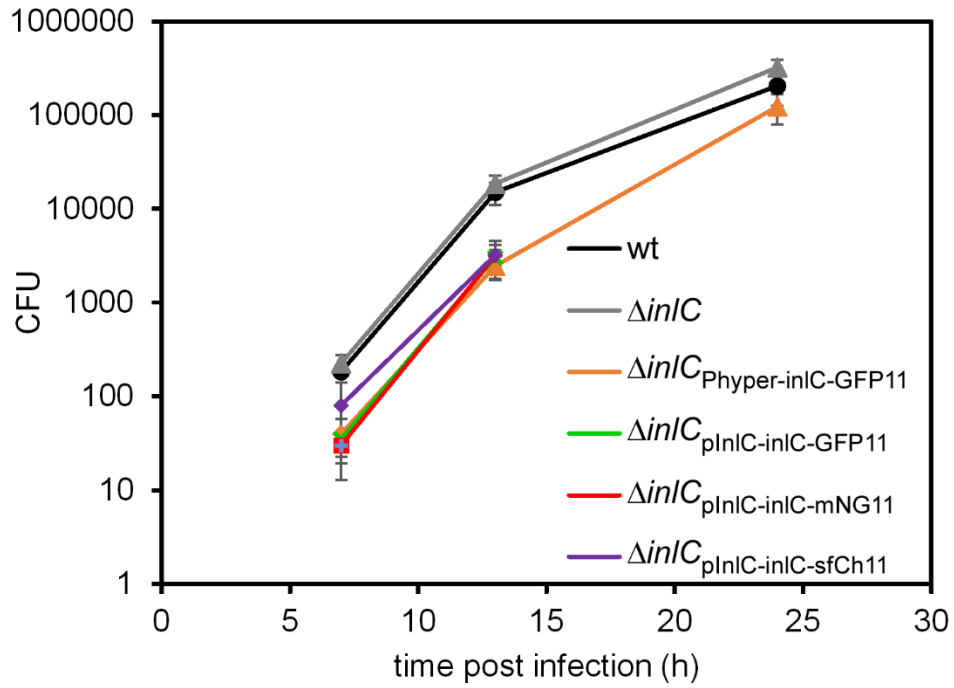

**Figure S2:** CFU analysis of HeLa cells infected for different lengths with the indicated strains (average from n=3 independent experiments, error bars indicate STD). 7 h time point:  $p = 0.015$ ; 13 h time point:  $p = 0.0035$ , 24 h time point:  $p = 0.0045$  (ANOVA test).

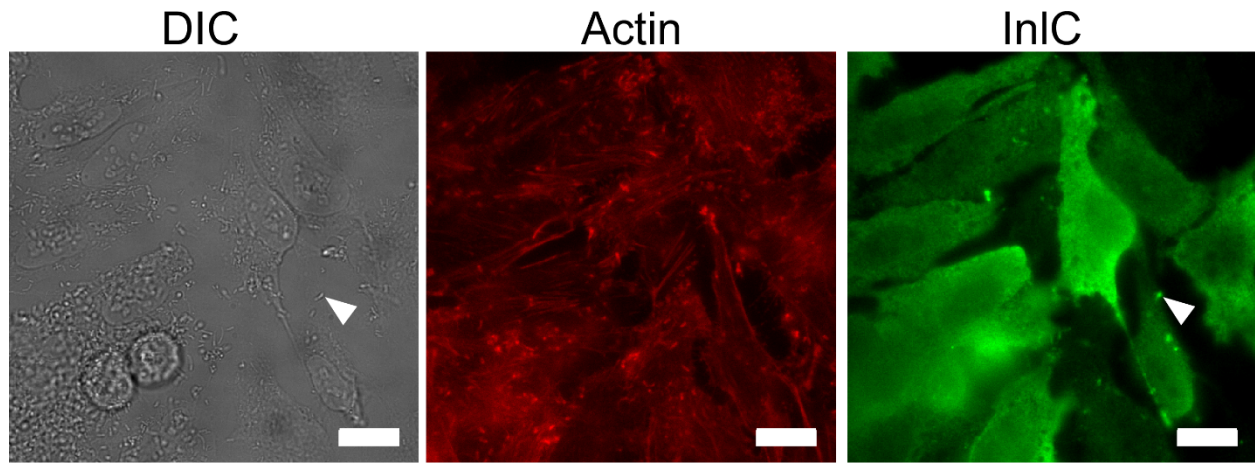

**Figure S3:** InIC occasionally localizes to puncta consistent with cell protrusions from *Listeria* spreading from cell to cell (white arrow). Shown is a select region of interest for infection of HeLa cells with  $\Delta inIC_{\text{Phyper-inIC-GFP11}}$  (see Fig. 3 for details). Scale bar = 20  $\mu\text{m}$ .

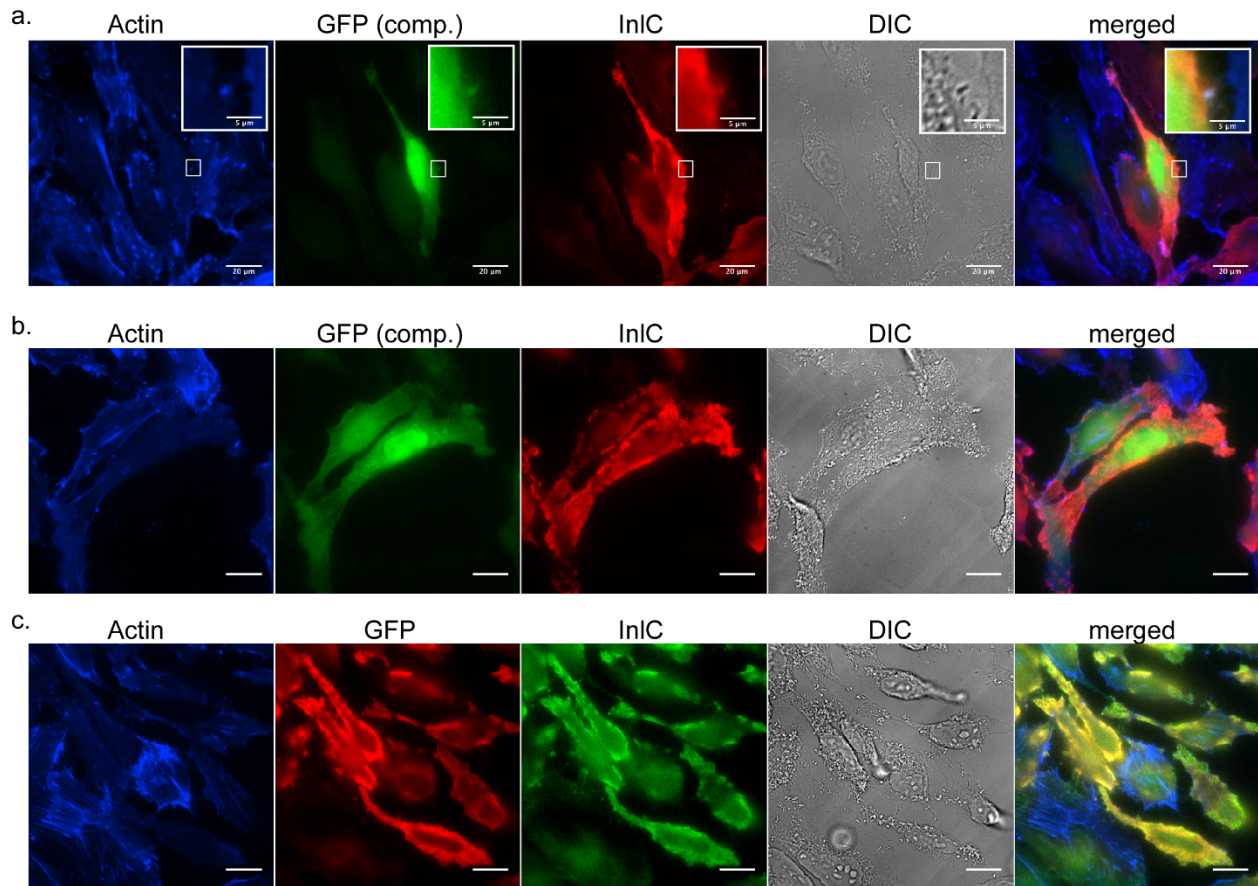

**Figure S4:** GFP signal after complementation colocalizes with fluorescence signal from anti-InIC immunofluorescence. (a, b) HeLa cells producing GFP1-10 were infected with  $\Delta inIC_{pInIC-inIC-GFP11}$  overnight and cells were fixed. After permeabilization, actin was stained with Coumarin-phalloidin and InIC was detected by immunofluorescence. The overall pattern and the insert in (a) demonstrate colocalization of complemented GFP signal and InIC. Note that the InIC signal in the nucleus appears brighter when detected by complemented GFP vs. anti-InIC immunofluorescence. This could be due to incomplete permeabilization of the nuclear envelope. Panels (a) and (b) show representative fields of view. (c) HeLa cells were infected with  $\Delta inIC_{pInIC-inIC-GFP11}$  overnight and cells were fixed. After permeabilization, actin was stained with Coumarin-phalloidin and InIC as well as GFP was detected by immunofluorescence. Scale bar = 20  $\mu\text{m}$  (scale bar for insert in panel (a) = 5  $\mu\text{m}$ ).



## Supplementary Tables

| Strain Name                       | Resistance   | Detailed genotype and source                                     |
|-----------------------------------|--------------|------------------------------------------------------------------|
| wt                                | none         | EGD-e wt (BUG 1600) (51)                                         |
| $\Delta inlC$                     | none         | EGD-e $\Delta inlC$ (Cossart lab collection, BUG 2118)           |
| $\Delta inlC_{Phyper-inlC-GFP11}$ | erythromycin | EGD-e $\Delta inlC$ pAT18_ <i>Phyper_inlC_GFP11</i> (this study) |
| $\Delta inlC_{pInlC-inlC-GFP11}$  | erythromycin | EGD-e $\Delta inlC$ pAT18_ <i>pInlC_inlC_GFP11</i> (this study)  |
| $\Delta inlC_{pInlC-inlC-mNG11}$  | erythromycin | EGD-e $\Delta inlC$ pAT18_ <i>pInlC_inlC_mNG11</i> (this study)  |
| $\Delta inlC_{pInlC-inlC-sfCh11}$ | erythromycin | EGD-e $\Delta inlC$ pAT18_ <i>pInlC_inlC_sfCh11</i> (this study) |

**Table S1:** Names, genotypes and source of all strains used in this study along with antibiotic selection markers.

*Phyper*

5' **TCTAGA**AGACGAAAGGGCC**TAATTTTGCAAAAAGTTGTTGACTTTATCTACAAGGTGTGGC**  
**ATAATGTGTGTCTGGCC**ATAAAGCAAGCATATAATATTGCGTTTCATCTTTAGAAGCGAATTC  
**GCCAATATTATAATTATCAAAAGAGAGGGGTGGCAAACGGTATTTGGCATTATTAGGTAAAA**  
**AATGTAGAAGGAGAGTGAAACCC** **ATG TTG...**

*pinlC*

5' **TCTAGA**AGACGAAAGGGCCATTATTAACGCTTGTTAATTTAAACATCTCTTATTTTTGCTA  
**ACATATAAGTATACAAAGGGACATAAAAAGGTAAACAGCGTTTGTTAAATAGGAAGTATATGA**  
**AAATCCTCTTTTGTGTTTCTAAATTTATTTTAAAGGAGTGGAGA**CGGTCCGCTAGC **ATG**  
**TTG...**

**Table S2:** Sequences of *Phyper* and *pinlC*. The 5' *Xba*I restriction site flanking the *inlC* fusion genes is indicated in bold and underlined and the beginning of the *inlC* coding sequence (ATG TTG...) at the 3' end of the promoters is shown in bold. Top: the blue underlined region is the *Phyper* region and the *hly* 5'UTR is shown in yellow and underlined. Bottom: the green underlined region corresponds to the *inlC* promoter.

|            |             |            |             |            |            |            |            |            |                |            |            |            |            |            |                |
|------------|-------------|------------|-------------|------------|------------|------------|------------|------------|----------------|------------|------------|------------|------------|------------|----------------|
| GFP11 tag  |             |            |             |            |            |            |            |            |                |            |            |            |            |            |                |
| K          | N           | A          | S           | G          | S          | S          | G          | E          | Q              | K          | L          | I          | S          | E          |                |
| 5'         | <u>AAG</u>  | <u>AAT</u> | <u>GCT</u>  | <u>AGC</u> | gga        | agt        | agt        | ggt        | <u>GAA</u>     | <u>CAA</u> | <u>AAA</u> | <u>CTC</u> | <u>ATC</u> | <u>TCA</u> | <u>GAA</u>     |
|            | <i>inlC</i> |            | <i>NheI</i> |            |            | linker     |            |            |                |            |            |            |            |            | <i>myc tag</i> |
| E          | D           | L          | G           | S          | S          | G          | R          | D          | H              | M          | V          | L          | H          | E          | Y              |
| <u>GAG</u> | <u>GAT</u>  | <u>TTA</u> | ggt         | agt        | agc        | gga        | <u>CGT</u> | <u>GAT</u> | <u>CAT</u>     | <u>ATG</u> | <u>GTA</u> | <u>TTA</u> | <u>CAT</u> | <u>GAA</u> | <u>TAT</u>     |
|            |             |            | linker      |            |            |            |            |            |                |            |            |            |            |            | <i>GFP11</i>   |
| V          | N           | A          | A           | G          | I          | T          | STOP       |            |                |            |            |            |            |            |                |
| <u>GTG</u> | <u>AAC</u>  | <u>GCG</u> | <u>GCG</u>  | <u>GGC</u> | <u>ATT</u> | <u>ACA</u> | TAA        | <u>GTC</u> | <u>GAC</u> ... |            |            |            |            |            |                |
|            |             |            |             |            |            |            |            |            | <i>Sall</i>    |            |            |            |            |            |                |
| mNG11 tag  |             |            |             |            |            |            |            |            |                |            |            |            |            |            |                |
| K          | N           | A          | S           | G          | S          | S          | G          | E          | Q              | K          | L          | I          | S          | E          |                |
| 5'         | <u>AAG</u>  | <u>AAT</u> | <u>GCT</u>  | <u>AGC</u> | gga        | agt        | agt        | ggt        | <u>GAA</u>     | <u>CAA</u> | <u>AAA</u> | <u>CTC</u> | <u>ATC</u> | <u>TCA</u> | <u>GAA</u>     |
|            | <i>inlC</i> |            | <i>NheI</i> |            |            | linker     |            |            |                |            |            |            |            |            | <i>myc tag</i> |
| E          | D           | L          | G           | S          | S          | G          | T          | E          | L              | N          | F          | K          | E          | W          | Q              |
| <u>GAG</u> | <u>GAT</u>  | <u>TTA</u> | ggt         | agt        | agc        | gga        | <u>ACA</u> | <u>GAA</u> | <u>TTA</u>     | <u>AAT</u> | <u>TTT</u> | <u>AAA</u> | <u>GAA</u> | <u>TGG</u> | <u>CAA</u>     |
|            |             |            | linker      |            |            |            |            |            |                |            |            |            |            |            | <i>mNG11</i>   |
| K          | A           | F          | T           | D          | M          | M          | STOP       |            |                |            |            |            |            |            |                |
| <u>AAA</u> | <u>GCA</u>  | <u>TTT</u> | <u>ACA</u>  | <u>GAT</u> | <u>ATG</u> | <u>ATG</u> | TAA        | <u>GTC</u> | <u>GAC</u> ... |            |            |            |            |            |                |
|            |             |            |             |            |            |            |            |            | <i>Sall</i>    |            |            |            |            |            |                |
| sfCh11 tag |             |            |             |            |            |            |            |            |                |            |            |            |            |            |                |
| K          | N           | A          | S           | G          | S          | S          | G          | E          | Q              | K          | L          | I          | S          | E          |                |
| 5'         | <u>AAG</u>  | <u>AAT</u> | <u>GCT</u>  | <u>AGC</u> | gga        | agt        | agt        | ggt        | <u>GAA</u>     | <u>CAA</u> | <u>AAA</u> | <u>CTC</u> | <u>ATC</u> | <u>TCA</u> | <u>GAA</u>     |
|            | <i>inlC</i> |            | <i>NheI</i> |            |            | linker     |            |            |                |            |            |            |            |            | <i>myc tag</i> |
| E          | D           | L          | G           | S          | S          | G          | Y          | T          | I              | V          | E          | Q          | Y          | E          | R              |
| <u>GAG</u> | <u>GAT</u>  | <u>TTA</u> | ggt         | agt        | agc        | gga        | <u>TAC</u> | <u>ACC</u> | <u>ATC</u>     | <u>GTA</u> | <u>GAA</u> | <u>CAA</u> | <u>TAC</u> | <u>GAA</u> | <u>CGT</u>     |
|            |             |            | linker      |            |            |            |            |            |                |            |            |            |            |            | <i>sfCh11</i>  |
| A          | E           | A          | R           | H          | S          | T          | STOP       |            |                |            |            |            |            |            |                |
| <u>GCA</u> | <u>GAA</u>  | <u>GCA</u> | <u>CGT</u>  | <u>CAT</u> | <u>AGT</u> | <u>ACA</u> | TAA        | <u>GTC</u> | <u>GAC</u> ... |            |            |            |            |            |                |
|            |             |            |             |            |            |            |            |            | <i>Sall</i>    |            |            |            |            |            |                |

**Table S3:** DNA and protein sequences of split-FP tags at the 3' end of *InlC* used in this study.

The 3' end of the *inlC* gene and relevant sequence features are annotated.



|                                                                                                                                                                                                                                                                                                    |
|----------------------------------------------------------------------------------------------------------------------------------------------------------------------------------------------------------------------------------------------------------------------------------------------------|
| <p><b>GFP1-10 (34)</b></p> <p>MVSKGEELFT GVPILVELD GDVNGHKFSV RGEGEGDATI GKLTCLKFICT<br/> TGKLPVPWPT LVTTLTYGVQ CFSRYPDHMK RHDFFKSAMP EGYVQERTIS<br/> FKDDGKYKTR AVVKFEGDTL VNRIELKGTD FKEDGNILGH KLEYNFNSHN<br/> VYITADKQKN GIKANFTVRH NVEDGSVQLA DHYQQNTPIG DGPVLLPDNH<br/> YLSTQTVLSK DPNEK</p> |
| <p><b>mNG1-10 (52)</b></p> <p>MVSKGEEDNM ASLPATHELH IFGSINGVDF DMVGQGTGNP NDGYEELNLK<br/> STKGDQLQFSP WILVPHIGYG FHQYLPYPDG MSPFQAAMVD GSGYQVHRMT<br/> QFEDGASLTV NYRYTYEGSH IKGEAQVMGT GFPADGPVMT NTLTAADWCM<br/> SKKTYPNDKT IISTFKWSYT TVNGKRYRST ARTTYTFAKP MAANYLKNQP<br/> MYVFRKTELK HSM</p>  |
| <p><b>sfCh1-10 (52)</b></p> <p>MEEDNMAIIK EFMRFKVHME GSVNGHEFEI EGEGEGHPYE GTQTAKLKVT<br/> KGGPLPFAWD ILS PQFMYGS KAYVKHPADI PDYLLKLSFPE GFTWERVMNF<br/> EDGGVVTVTQ DSSLQDGQFI YKVKLLGINF PSDGPVMQKK TMGWEASTER<br/> MYPEDGALKG EINQRLKLD GGHYDAEVKT TYKAKKPVQL PGAYNVDIKL<br/> DITSHNED</p>       |

**Table S4:** Protein sequences for fluorescent protein 1-10 (FP1-10) constructs used in this study.

Each FP1-10 corresponds to the first 10  $\beta$ -strands of the FP; the last and 11<sup>th</sup> strand represents the other fragment of the split-FP system (Table S3).

| <b>Antibody / stain (source)</b>                                                | <b>Dilution / incubation time</b>                                                                                  | <b>Purpose</b>                          |
|---------------------------------------------------------------------------------|--------------------------------------------------------------------------------------------------------------------|-----------------------------------------|
| Alexa 594-Phalloidin (Fisher Scientific, Waltham, MA)                           | 1:1,000 / 45 min                                                                                                   | Actin staining in fixed cells           |
| Coumarin-phalloidin (Sigma-Aldrich, St. Louis, MO)                              | 1:1,000 / 45 min                                                                                                   | Actin staining in fixed cells           |
| Anti-GFP (mouse) (Thermo Fisher Scientific, Waltham, MA)                        | 1:1,000 / 45 min                                                                                                   | Immunofluorescence                      |
| Anti-InlC (rabbit) (Cossart lab (46))                                           | <u>Immunofluorescence:</u> 1:500 / 45 min at room temperature<br><u>Western blotting:</u> 1:500 / overnight at 4°C | Immunofluorescence and Western blotting |
| Goat anti-rabbit HRP conjugated (Novus Biologicals, Littleton, CO)              | 1:2,000 / 1 h at room temperature                                                                                  | Western blotting                        |
| Rabbit anti-mouse IgG (Alexa Fluor 488) (Thermo Fisher Scientific, Waltham, MA) | 1:1,000 / 45 min at room temperature                                                                               | Immunofluorescence                      |
| Donkey anti-rabbit IgG H&L (Alexa Fluor 568) (Abcam, Cambridge, MA)             | 1:1,000 / 45 min at room temperature                                                                               | Immunofluorescence                      |

|                                                                           |                                         |                    |
|---------------------------------------------------------------------------|-----------------------------------------|--------------------|
| Donkey anti-rabbit IgG H&L<br>(Alexa Fluor 488) (Abcam,<br>Cambridge, MA) | 1:1,000 / 45 min at room<br>temperature | Immunofluorescence |
|---------------------------------------------------------------------------|-----------------------------------------|--------------------|

**Table S5:** List of antibodies and stains used in this study.

|                                                                        |                                                                                                                                       |                                                                                                                                          |                                                                                                                                    |
|------------------------------------------------------------------------|---------------------------------------------------------------------------------------------------------------------------------------|------------------------------------------------------------------------------------------------------------------------------------------|------------------------------------------------------------------------------------------------------------------------------------|
| Immunofluorescence of infections (Fig. 3, S2)                          | <u>GFP:</u><br>287 ms exposure, EM gain 1 MHz at 16-bit readout mode, EM gain multiplier = 200, neutral density filter (25% emission) | <u>mCherry:</u><br>90 ms exposure, EM gain 1 MHz at 16-bit readout mode, EM gain multiplier = 200, neutral density filter (25% emission) | <u>DIC:</u><br>50 ms exposure, EM gain 1 MHz at 16-bit readout mode, EM gain multiplier = 0, neutral density filter (25% emission) |
| Proof of principle live imaging of split-GFP complementation (Fig. 4a) | <u>GFP:</u><br>50 ms exposure, EM gain 1 MHz at 16-bit readout mode, EM gain multiplier = 200, neutral density filter (25% emission)  | <u>Dapi:</u><br>287 ms exposure, EM gain 1 MHz at 16-bit readout mode, EM gain multiplier = 200, neutral density filter (25% emission)   | <u>DIC:</u><br>50 ms exposure, EM gain 1 MHz at 16-bit readout mode, EM gain multiplier = 0, neutral density filter (25% emission) |
| GFP complementation time course (Fig. 4b)                              | <u>GFP:</u><br>50 ms exposure, EM gain 1 MHz at 16-bit readout mode, EM gain multiplier = 200, neutral density filter (25% emission)  | <u>Dapi:</u><br>287 ms exposure, EM gain 1 MHz at 16-bit readout mode, EM gain multiplier = 200, neutral density filter (25% emission)   | <u>DIC:</u><br>50 ms exposure, EM gain 1 MHz at 16-bit readout mode, EM gain multiplier = 0, neutral density filter (25% emission) |
| GFP complementation                                                    | <u>GFP:</u>                                                                                                                           | <u>Dapi:</u>                                                                                                                             | <u>DIC:</u>                                                                                                                        |



|                                              |                                                                                                             |                                                                                                          |                                                                                                      |
|----------------------------------------------|-------------------------------------------------------------------------------------------------------------|----------------------------------------------------------------------------------------------------------|------------------------------------------------------------------------------------------------------|
| promoter comparison end point (Fig. 8)       | 287 ms exposure, EM<br>gain 1 MHz at 16-bit<br>readout mode, EM<br>gain multiplier = 200                    | 287 ms exposure, EM<br>gain 1 MHz at 16-bit<br>readout mode, EM<br>gain multiplier = 200                 | 70 ms exposure, EM<br>gain 1 MHz at 16-bit<br>readout mode, EM<br>gain multiplier = 0                |
| Super-folder Cherry complementation (Fig. 8) | <u>mCherry:</u><br>287 ms exposure, EM<br>gain 1 MHz at 16-bit<br>readout mode, EM<br>gain multiplier = 200 | <u>DIC:</u><br>50 ms exposure, EM<br>gain 1 MHz at 16-bit<br>readout mode, EM<br>gain multiplier = 200   |                                                                                                      |
| mNeonGreen complementation (Fig. S3)         | <u>GFP:</u><br>287 ms exposure, EM<br>gain 1 MHz at 16-bit<br>readout mode, EM<br>gain multiplier = 200     | <u>DIC:</u><br>50 ms exposure, EM<br>gain 1 MHz at 16-bit<br>readout mode, EM<br>gain multiplier = 0     |                                                                                                      |
| GFP complementation in macrophages (Fig. 7)  | <u>GFP:</u><br>287 ms exposure, EM<br>gain 1 MHz at 16-bit<br>readout mode, EM<br>gain multiplier = 200     | <u>Dapi:</u><br>287 ms exposure, EM<br>gain 1 MHz at 16-bit<br>readout mode, EM<br>gain multiplier = 200 | <u>DIC:</u><br>90 ms exposure, EM<br>gain 1 MHz at 16-bit<br>readout mode, EM<br>gain multiplier = 0 |

**Table S6:** Settings for fluorescence microscopy on Nikon Ti-E widefield fluorescence microscope.
